# Supplementary material for: Neighbor Overlap Is Enriched in the Yeast Interaction Network: Analysis and Implications
Source: PLoS One. 2012 Jun 26;7(6):e39662. doi: 10.1371/journal.pone.0039662 (PMC3383679; doi:10.1371/journal.pone.0039662)
Supplement: Table S1 — The table lists the details of protein pairs for which NOnorm >0.5 and the degree of both proteins in the protein interaction network is ≥5. (XLS) [file pone.0039662.s007.xls]

## Sheet: TableS1
ProteinA	ProteinB	DegreeA	DegreeB	Nonorm	Nojaccard	Nocount
P25358	P18414	66	8	1	0.121212	8
P23561	P06784	15	5	1	0.333333	5
Q12263	P25389	13	6	1	0.461538	6
Q12102	Q08553	19	5	1	0.263158	5
Q08553	Q06632	5	17	1	0.294118	5
Q08553	P35728	5	16	1	0.3125	5
Q08224	Q06490	93	5	1	0.0537634	5
Q06678	P51998	6	5	1	0.833333	5
Q04660	P38805	72	7	1	0.0972222	7
Q04601	P09798	9	13	1	0.692308	9
Q03782	P34160	10	39	1	0.25641	10
P53600	P41810	6	11	1	0.545455	6
P53600	P40509	6	9	1	0.666667	6
P53600	P32074	6	16	1	0.375	6
P53261	P32892	39	8	1	0.205128	8
P51996	P38555	5	14	1	0.357143	5
P43593	P32496	14	26	1	0.538462	14
P40478	P38286	8	101	1	0.0792079	8
P40478	P38264	8	109	1	0.0733945	8
P38805	P36160	7	45	1	0.155556	7
P38716	P29311	5	86	1	0.0581395	5
P38716	P12398	5	175	1	0.0285714	5
P38264	P18414	109	8	1	0.0733945	8
P33298	O13563	83	8	1	0.0963855	8
Q12250	P43593	46	14	0.928571	0.276596	13
Q01939	P40327	50	14	0.928571	0.254902	13
P43593	P38886	14	37	0.928571	0.342105	13
P40548	P38286	41	101	0.926829	0.365385	38
P39692	P04173	13	156	0.923077	0.0764331	12
P38286	P36057	101	35	0.914286	0.307692	32
Q02892	P40693	27	11	0.909091	0.357143	10
Q12450	P38286	42	101	0.904762	0.361905	38
P07342	P04173	31	156	0.903226	0.176101	28
P40319	P35723	79	51	0.901961	0.547619	46
Q12440	Q12157	13	10	0.9	0.642857	9
Q12440	Q08683	13	10	0.9	0.642857	9
Q12157	P16522	10	25	0.9	0.346154	9
Q12157	Q08683	10	10	0.9	0.818182	9
Q08683	P16522	10	25	0.9	0.346154	9
Q04697	P32842	60	10	0.9	0.147541	9
Q04439	P36006	24	20	0.9	0.692308	18
P52891	P36161	34	10	0.9	0.257143	9
P49687	P36161	20	10	0.9	0.428571	9
P40548	P32842	41	10	0.9	0.214286	9
P38334	P36149	14	10	0.9	0.6	9
P38286	P32842	101	10	0.9	0.0882353	9
P38264	P32842	109	10	0.9	0.0818182	9
P32842	P25358	10	66	0.9	0.134328	9
P25303	P04173	29	156	0.896552	0.163522	26
P08431	P04173	19	156	0.894737	0.107595	17
Q12440	Q04601	13	9	0.888889	0.571429	8
Q12440	P38042	13	9	0.888889	0.571429	8
Q12245	P23595	9	45	0.888889	0.173913	8
Q12157	Q04601	10	9	0.888889	0.727273	8
Q12157	P38042	10	9	0.888889	0.727273	8
Q08683	Q04601	10	9	0.888889	0.727273	8
Q08683	P38042	10	9	0.888889	0.727273	8
Q04601	P16522	9	25	0.888889	0.307692	8
P53886	P38042	10	9	0.888889	0.727273	8
P53875	P31334	9	32	0.888889	0.242424	8
P53068	P38042	10	9	0.888889	0.727273	8
P38264	P31379	109	9	0.888889	0.0727273	8
P38042	P16522	9	25	0.888889	0.307692	8
P38042	P14724	9	11	0.888889	0.666667	8
P40319	P36057	79	35	0.885714	0.373494	31
P38264	P36057	109	35	0.885714	0.274336	31
P40548	P40319	41	79	0.878049	0.428571	36
P40548	P38264	41	109	0.878049	0.315789	36
P22147	P15424	46	8	0.875	0.148936	7
Q12522	Q12389	48	8	0.875	0.142857	7
Q12450	P40478	42	8	0.875	0.162791	7
Q12389	Q04660	8	72	0.875	0.0958904	7
Q12389	Q03532	8	25	0.875	0.269231	7
Q12270	P38130	8	12	0.875	0.538462	7
Q12250	O13563	46	8	0.875	0.148936	7
P15424	P04147	8	62	0.875	0.111111	7
Q08224	P26263	93	8	0.875	0.0744681	7
Q06819	P20053	8	37	0.875	0.184211	7
Q04660	P32892	72	8	0.875	0.0958904	7
Q04373	P32892	20	8	0.875	0.333333	7
Q03532	P32892	25	8	0.875	0.269231	7
Q02795	P39007	33	8	0.875	0.205882	7
Q02774	P40478	46	8	0.875	0.148936	7
P53337	P18414	38	8	0.875	0.179487	7
P49018	P40440	59	8	0.875	0.116667	7
P43588	O13563	24	8	0.875	0.28	7
P42943	P39077	22	16	0.875	0.583333	14
P40350	P38286	24	101	0.875	0.201923	21
P40319	P18414	79	8	0.875	0.0875	7
P39078	P39077	23	16	0.875	0.56	14
P39077	P39076	16	36	0.875	0.368421	14
P38779	P32892	29	8	0.875	0.233333	7
P38286	P18414	101	8	0.875	0.0686275	7
P32349	P22276	8	12	0.875	0.538462	7
P53337	P40319	38	79	0.868421	0.392857	33
P53337	P38286	38	101	0.868421	0.311321	33
P39987	P12398	15	175	0.866667	0.0734463	13
P37012	P19882	15	168	0.866667	0.0764706	13
Q08986	P38842	22	61	0.863636	0.296875	19
P38286	P35723	101	51	0.862745	0.407407	44
P00854	P00830	7	127	0.857143	0.046875	6
P24719	P22211	40	7	0.857143	0.146341	6
Q99380	Q92316	18	7	0.857143	0.315789	6
Q92316	P48439	7	10	0.857143	0.545455	6
Q92316	P46964	7	8	0.857143	0.666667	6
Q92316	P41543	7	20	0.857143	0.285714	6
Q92316	P33767	7	39	0.857143	0.15	6
Q12517	P49960	20	7	0.857143	0.285714	6
Q12377	P43593	30	14	0.857143	0.375	12
Q12270	P14359	8	7	0.857143	0.666667	6
Q08723	P40327	26	14	0.857143	0.428571	12
Q07904	Q04697	7	60	0.857143	0.0983607	6
Q05900	P53207	14	18	0.857143	0.6	12
Q04062	P40327	22	14	0.857143	0.5	12
P54784	P38826	11	7	0.857143	0.5	6
P53622	P43621	51	14	0.857143	0.226415	12
P53261	P38805	39	7	0.857143	0.15	6
P53196	P43593	39	14	0.857143	0.292683	12
P53176	P39552	32	7	0.857143	0.181818	6
P53096	P25357	7	8	0.857143	0.666667	6
P53096	P40480	7	9	0.857143	0.6	6
P53096	P38262	7	29	0.857143	0.2	6
P49960	P25644	7	36	0.857143	0.162162	6
P49960	P47017	7	45	0.857143	0.130435	6
P49960	P40070	7	45	0.857143	0.130435	6
P43593	P22141	14	44	0.857143	0.26087	12
P43593	P33299	14	32	0.857143	0.352941	12
P40327	P40016	14	18	0.857143	0.6	12
P07251	P00854	109	7	0.857143	0.0545455	6
P39552	P38264	7	109	0.857143	0.0545455	6
P38826	P09119	7	11	0.857143	0.5	6
P38826	P32833	7	8	0.857143	0.666667	6
P32585	P25648	13	7	0.857143	0.428571	6
P32327	P05694	7	37	0.857143	0.157895	6
P32259	P25648	27	7	0.857143	0.214286	6
P30902	P07251	7	109	0.857143	0.0545455	6
Q12445	P46961	20	62	0.85	0.261538	17
P20435	P20434	13	17	0.846154	0.578947	11
Q06648	P38785	17	13	0.846154	0.578947	11
Q06135	P25358	13	66	0.846154	0.161765	11
Q06135	P40319	13	79	0.846154	0.135802	11
P38264	P35723	109	51	0.843137	0.367521	43
P25358	P08456	66	19	0.842105	0.231884	16
P53337	P25358	38	66	0.842105	0.444444	32
P53337	P38264	38	109	0.842105	0.278261	32
P38286	P08456	101	19	0.842105	0.153846	16
P38264	P08456	109	19	0.842105	0.142857	16
P32570	P25046	31	25	0.84	0.6	21
P00360	P00358	44	31	0.83871	0.530612	26
P25379	P04173	24	156	0.833333	0.125	20
P19882	P04807	168	12	0.833333	0.0588235	10
Q99278	P19659	6	22	0.833333	0.217391	5
Q99278	P38782	6	11	0.833333	0.416667	5
Q99278	P38304	6	16	0.833333	0.294118	5
Q99278	P34162	6	31	0.833333	0.15625	5
Q99278	P32585	6	13	0.833333	0.357143	5
Q12450	P40319	42	79	0.833333	0.406977	35
Q12450	P38264	42	109	0.833333	0.301724	35
Q12343	Q12321	23	6	0.833333	0.208333	5
Q12321	P25648	6	7	0.833333	0.625	5
Q12321	P19263	6	10	0.833333	0.454545	5
Q12321	P38782	6	11	0.833333	0.416667	5
Q12321	P38304	6	16	0.833333	0.294118	5
Q12321	P34162	6	31	0.833333	0.15625	5
Q12321	P32585	6	13	0.833333	0.357143	5
Q12321	P32569	6	111	0.833333	0.0446429	5
Q12321	P32259	6	27	0.833333	0.178571	5
Q12060	P38811	6	16	0.833333	0.294118	5
Q12060	P35177	6	20	0.833333	0.238095	5
Q12006	P25358	12	66	0.833333	0.147059	10
Q12006	P40548	12	41	0.833333	0.232558	10
Q12006	P40319	12	79	0.833333	0.123457	10
Q12006	P38264	12	109	0.833333	0.0900901	10
Q08980	P25621	37	6	0.833333	0.131579	5
Q08273	Q03919	73	6	0.833333	0.0675676	5
Q08162	P53859	17	12	0.833333	0.526316	10
Q08162	P38792	17	12	0.833333	0.526316	10
Q07468	P27801	6	19	0.833333	0.25	5
Q06678	P12687	6	9	0.833333	0.5	5
Q06678	P36517	6	6	0.833333	0.714286	5
Q06678	P36516	6	7	0.833333	0.625	5
Q06405	P00854	6	7	0.833333	0.625	5
Q06405	P00830	6	127	0.833333	0.0390625	5
Q06405	P07251	6	109	0.833333	0.0454545	5
Q06224	P39927	18	12	0.833333	0.5	10
Q05933	P40518	9	6	0.833333	0.5	5
Q05636	P53859	18	12	0.833333	0.5	10
Q05498	P41811	6	111	0.833333	0.0446429	5
Q05498	P38987	6	163	0.833333	0.0304878	5
Q05016	P15992	12	113	0.833333	0.0869565	10
Q04437	Q04049	110	12	0.833333	0.0892857	10
Q03956	P52286	6	44	0.833333	0.111111	5
Q03956	P47104	6	8	0.833333	0.555556	5
Q03323	P38337	10	6	0.833333	0.454545	5
Q03012	P38337	10	6	0.833333	0.454545	5
Q02932	Q02821	6	209	0.833333	0.0238095	5
Q02932	P04147	6	62	0.833333	0.0793651	5
Q02908	P42935	6	8	0.833333	0.555556	5
Q02908	P38874	6	7	0.833333	0.625	5
Q01329	P39927	19	12	0.833333	0.47619	10
P81450	P00830	6	127	0.833333	0.0390625	5
P81450	P07251	6	109	0.833333	0.0454545	5
P54791	P54790	6	7	0.833333	0.625	5
P54791	P54784	6	11	0.833333	0.416667	5
P54791	P50874	6	7	0.833333	0.625	5
P54791	P09119	6	11	0.833333	0.416667	5
P54791	P38826	6	7	0.833333	0.625	5
P54791	P32833	6	8	0.833333	0.555556	5
P53859	P53256	12	16	0.833333	0.555556	10
P53859	P46948	12	16	0.833333	0.555556	10
P53731	P40518	11	6	0.833333	0.416667	5
P53622	P53600	51	6	0.833333	0.0961538	5
P53600	P25385	6	26	0.833333	0.185185	5
P53600	P43621	6	14	0.833333	0.333333	5
P53600	P41811	6	111	0.833333	0.0446429	5
P53114	P25648	6	7	0.833333	0.625	5
P53114	P32585	6	13	0.833333	0.357143	5
P53114	P32259	6	27	0.833333	0.178571	5
P53090	P05694	6	37	0.833333	0.131579	5
P53090	P04806	6	95	0.833333	0.0520833	5
P47117	P40518	11	6	0.833333	0.416667	5
P47076	P20434	6	17	0.833333	0.277778	5
P47076	P07703	6	126	0.833333	0.0393701	5
P47076	P35718	6	15	0.833333	0.3125	5
P46961	P19145	62	6	0.833333	0.0793651	5
P43132	P38337	10	6	0.833333	0.454545	5
P40518	P38328	6	23	0.833333	0.208333	5
P40518	P33204	6	9	0.833333	0.5	5
P40518	P32381	6	88	0.833333	0.0561798	5
P40350	P40319	24	79	0.833333	0.240964	20
P40350	P38264	24	109	0.833333	0.176991	20
P39927	P32598	12	89	0.833333	0.10989	10
P39706	P38337	18	6	0.833333	0.263158	5
P38993	P19145	36	6	0.833333	0.135135	5
P38987	P15731	163	6	0.833333	0.0304878	5
P38902	P27999	6	56	0.833333	0.0877193	5
P38902	P08518	6	44	0.833333	0.111111	5
P38842	P19145	61	6	0.833333	0.0806452	5
P38827	P38337	15	6	0.833333	0.3125	5
P38337	P38123	6	22	0.833333	0.217391	5
P38337	P36104	6	17	0.833333	0.277778	5
P38286	P37267	101	6	0.833333	0.0490196	5
P38264	P37267	109	6	0.833333	0.0454545	5
P36517	P12687	6	9	0.833333	0.5	5
P36057	P25358	35	66	0.828571	0.402778	29
Q02774	P38286	46	101	0.826087	0.348624	38
Q12102	Q06632	19	17	0.823529	0.636364	14
P33759	P28817	36	17	0.823529	0.358974	14
P32902	P28817	35	17	0.823529	0.368421	14
P40319	P38286	79	101	0.822785	0.565217	65
P50944	P38842	28	61	0.821429	0.348485	23
P50944	P38723	28	46	0.821429	0.45098	23
Q03532	P40693	25	11	0.818182	0.333333	9
P53261	P40693	39	11	0.818182	0.219512	9
P53045	P38353	52	22	0.818182	0.321429	18
P46961	P38353	62	22	0.818182	0.272727	18
P42943	P39078	22	23	0.818182	0.666667	18
P40482	P15303	11	18	0.818182	0.45	9
P38723	P38353	46	22	0.818182	0.36	18
Q04697	P53337	60	38	0.815789	0.462687	31
P47154	P38286	38	101	0.815789	0.287037	31
P47154	P38264	38	109	0.815789	0.267241	31
Q12402	P40319	27	79	0.814815	0.261905	22
Q12102	P35728	19	16	0.8125	0.590909	13
Q08162	P53256	17	16	0.8125	0.65	13
Q06632	P35728	17	16	0.8125	0.65	13
Q05636	P46948	18	16	0.8125	0.619048	13
Q01329	P35728	19	16	0.8125	0.590909	13
P87284	P40319	16	79	0.8125	0.158537	13
P38286	P16661	101	32	0.8125	0.242991	26
Q04697	P40548	60	41	0.804878	0.485294	33
P40548	P25358	41	66	0.804878	0.445946	33
Q02774	P40319	46	79	0.804348	0.420455	37
P35723	P25358	51	66	0.803922	0.539474	41
P40319	P25358	79	66	0.80303	0.576087	53
P29496	P24279	5	9	0.8	0.4	4
P00937	P00924	5	67	0.8	0.0588235	4
P26188	P25846	52	10	0.8	0.148148	8
P19882	P00937	168	5	0.8	0.0236686	4
Q99207	Q06512	6	5	0.8	0.571429	4
Q12460	Q08965	16	5	0.8	0.235294	4
Q12450	Q04399	42	5	0.8	0.0930233	4
Q12446	P40453	68	5	0.8	0.057971	4
Q12440	P53886	13	10	0.8	0.533333	8
Q12440	P53068	13	10	0.8	0.533333	8
P16451	P09624	5	49	0.8	0.08	4
Q12309	P53277	23	5	0.8	0.166667	4
P16140	P00931	113	5	0.8	0.0350877	4
Q12220	P25635	5	64	0.8	0.0615385	4
Q12220	P15646	5	31	0.8	0.125	4
Q12220	Q06679	5	9	0.8	0.4	4
Q12220	Q06078	5	8	0.8	0.444444	4
Q12220	Q02931	5	15	0.8	0.25	4
Q12220	Q02354	5	8	0.8	0.444444	4
Q12220	P53914	5	28	0.8	0.137931	4
Q12220	P42945	5	15	0.8	0.25	4
Q12163	P12398	5	175	0.8	0.0227273	4
Q12157	P14724	10	11	0.8	0.615385	8
Q12157	P53886	10	10	0.8	0.666667	8
Q12157	P53068	10	10	0.8	0.666667	8
Q12157	P09798	10	13	0.8	0.533333	8
Q12124	P25046	26	25	0.8	0.645161	20
Q12024	P53136	26	10	0.8	0.285714	8
Q08975	Q06490	42	5	0.8	0.0930233	4
Q08965	P15646	5	31	0.8	0.125	4
Q08965	P53914	5	28	0.8	0.137931	4
Q08965	P42945	5	15	0.8	0.25	4
Q08965	P38333	5	33	0.8	0.117647	4
Q08683	P14724	10	11	0.8	0.615385	8
Q08683	P53886	10	10	0.8	0.666667	8
Q08683	P53068	10	10	0.8	0.666667	8
Q08683	P09798	10	13	0.8	0.533333	8
Q08553	P29468	5	19	0.8	0.2	4
Q08553	P20448	5	19	0.8	0.2	4
Q08553	Q06224	5	18	0.8	0.210526	4
Q08553	Q06102	5	14	0.8	0.266667	4
Q08553	Q01329	5	19	0.8	0.2	4
Q08553	P42841	5	26	0.8	0.148148	4
Q08553	P42073	5	17	0.8	0.222222	4
Q08224	P38716	93	5	0.8	0.0425532	4
Q08096	P25586	5	34	0.8	0.114286	4
Q06706	Q02884	12	5	0.8	0.307692	4
P14681	P05066	76	10	0.8	0.102564	8
Q06679	P36144	9	5	0.8	0.4	4
Q06678	P22353	6	5	0.8	0.571429	4
Q06512	P15646	5	31	0.8	0.125	4
Q06512	Q06287	5	19	0.8	0.2	4
Q06512	Q04217	5	10	0.8	0.363636	4
Q06512	Q02354	5	8	0.8	0.444444	4
Q06512	P53914	5	28	0.8	0.137931	4
Q06512	P47083	5	8	0.8	0.444444	4
Q06512	P40055	5	49	0.8	0.08	4
Q06512	P35194	5	22	0.8	0.173913	4
Q06512	P32899	5	7	0.8	0.5	4
Q06490	P19882	5	168	0.8	0.0236686	4
Q06490	P12709	5	120	0.8	0.0330579	4
Q06405	P09457	6	5	0.8	0.571429	4
Q06337	P38811	5	16	0.8	0.235294	4
Q06144	P53224	6	5	0.8	0.571429	4
Q06091	P53277	7	5	0.8	0.5	4
Q06078	P36144	8	5	0.8	0.444444	4
Q05636	P38801	18	5	0.8	0.210526	4
Q04868	Q02884	6	5	0.8	0.571429	4
Q04697	P38428	60	15	0.8	0.190476	12
Q04693	P49955	16	10	0.8	0.444444	8
Q04439	P40453	24	5	0.8	0.16	4
Q04437	P25846	110	10	0.8	0.0714286	8
Q04437	P38793	110	5	0.8	0.036036	4
Q04437	P05066	110	10	0.8	0.0714286	8
Q04399	P38286	5	101	0.8	0.0392157	4
Q04399	P38264	5	109	0.8	0.0363636	4
Q04372	Q00362	5	48	0.8	0.0816327	4
Q04048	P53277	16	5	0.8	0.235294	4
Q03940	P00937	27	5	0.8	0.142857	4
Q03782	Q00916	10	67	0.8	0.115942	8
Q03782	P53207	10	18	0.8	0.4	8
Q03655	P13134	44	5	0.8	0.0888889	4
Q03654	P53277	23	5	0.8	0.166667	4
P12709	P00931	120	5	0.8	0.0330579	4
Q02931	P36144	15	5	0.8	0.25	4
Q02908	Q02884	6	5	0.8	0.571429	4
Q02884	P42935	5	8	0.8	0.444444	4
Q02884	P38874	5	7	0.8	0.5	4
P12398	P00937	175	5	0.8	0.0227273	4
P12398	P00931	175	5	0.8	0.0227273	4
Q02821	P38801	209	5	0.8	0.0190476	4
Q02354	P36144	8	5	0.8	0.444444	4
Q02336	P25554	30	5	0.8	0.129032	4
Q02336	P38915	30	5	0.8	0.129032	4
P11986	P06169	10	64	0.8	0.121212	8
Q00776	P38700	44	5	0.8	0.0888889	4
P89105	P14164	20	5	0.8	0.190476	4
P81450	P09457	6	5	0.8	0.571429	4
P54837	P48415	10	5	0.8	0.363636	4
P54115	P38716	49	5	0.8	0.08	4
P53914	P36144	28	5	0.8	0.137931	4
P53886	P16522	10	25	0.8	0.296296	8
P53886	P14724	10	11	0.8	0.615385	8
P53886	P53068	10	10	0.8	0.666667	8
P53859	P38801	12	5	0.8	0.307692	4
P53633	P42884	20	5	0.8	0.190476	4
P53622	P38793	51	5	0.8	0.0769231	4
P53541	P38987	10	163	0.8	0.0484848	8
P53337	P32842	38	10	0.8	0.2	8
P53277	P28004	5	22	0.8	0.173913	4
P53277	P21374	5	8	0.8	0.444444	4
P53277	P33334	5	37	0.8	0.105263	4
P53277	P32523	5	15	0.8	0.25	4
P53254	P14164	51	5	0.8	0.0769231	4
P53224	P25045	5	8	0.8	0.444444	4
P53136	P38779	10	29	0.8	0.258065	8
P53068	P16522	10	25	0.8	0.296296	8
P53068	P14724	10	11	0.8	0.615385	8
P53045	P13134	52	5	0.8	0.0754717	4
P09734	P00937	37	5	0.8	0.105263	4
P52910	P16474	5	65	0.8	0.0606061	4
P51998	P22353	5	5	0.8	0.666667	4
P51998	P12687	5	9	0.8	0.4	4
P51998	P36517	5	6	0.8	0.571429	4
P51998	P36516	5	7	0.8	0.5	4
P51996	P01123	5	25	0.8	0.153846	4
P51996	P07560	5	7	0.8	0.5	4
P51996	P38146	5	12	0.8	0.307692	4
P51996	P36018	5	10	0.8	0.363636	4
P51996	P32939	5	9	0.8	0.4	4
P09457	P07251	5	109	0.8	0.0363636	4
P48415	P32803	5	45	0.8	0.0869565	4
P47822	P32569	10	111	0.8	0.0707965	8
P47079	P40413	74	15	0.8	0.155844	12
P46948	P38801	16	5	0.8	0.235294	4
P46943	P04173	5	156	0.8	0.0254777	4
P46673	P36161	16	10	0.8	0.444444	8
P42945	P36144	15	5	0.8	0.25	4
P42884	P39979	5	6	0.8	0.571429	4
P42884	P38122	5	7	0.8	0.5	4
P42884	P32263	5	8	0.8	0.444444	4
P07703	P00815	126	5	0.8	0.0314961	4
P41819	P38333	5	33	0.8	0.117647	4
P41811	P00815	111	5	0.8	0.0357143	4
P41811	P38793	111	5	0.8	0.0357143	4
P41807	P22203	5	16	0.8	0.235294	4
P41807	P17255	5	37	0.8	0.105263	4
P41338	P19882	5	168	0.8	0.0236686	4
P40548	P38428	41	15	0.8	0.272727	12
P40466	P14164	34	5	0.8	0.114286	4
P40362	P14164	35	5	0.8	0.111111	4
P40319	P38703	79	15	0.8	0.146341	12
P40319	P38428	79	15	0.8	0.146341	12
P40319	P32842	79	10	0.8	0.0987654	8
P39954	P31116	40	5	0.8	0.097561	4
P39936	P39935	20	36	0.8	0.4	16
P39108	P38793	53	5	0.8	0.0740741	4
P38987	P05066	163	10	0.8	0.0484848	8
P38915	P32494	5	25	0.8	0.153846	4
P38842	P13134	61	5	0.8	0.0645161	4
P38793	P14741	5	83	0.8	0.047619	4
P38793	P07703	5	126	0.8	0.0314961	4
P38793	P38316	5	91	0.8	0.0434783	4
P38793	P38153	5	28	0.8	0.137931	4
P38793	P32491	5	41	0.8	0.0952381	4
P38793	P31378	5	24	0.8	0.16	4
P38716	P15992	5	113	0.8	0.0350877	4
P38716	P12709	5	120	0.8	0.0330579	4
P38716	P06169	5	64	0.8	0.0615385	4
P38716	P05694	5	37	0.8	0.105263	4
P38716	P04173	5	156	0.8	0.0254777	4
P38708	P00937	25	5	0.8	0.153846	4
P38708	P04173	25	156	0.8	0.124224	20
P38703	P38286	15	101	0.8	0.115385	12
P06169	P00931	64	5	0.8	0.0615385	4
P38428	P38286	15	101	0.8	0.115385	12
P38428	P38264	15	109	0.8	0.107143	12
P38428	P35723	15	51	0.8	0.222222	12
P36144	P15646	5	31	0.8	0.125	4
P35723	P32842	51	10	0.8	0.150943	8
P33767	P13134	39	5	0.8	0.1	4
P33329	P32598	5	89	0.8	0.0444444	4
P04173	P00937	156	5	0.8	0.0254777	4
P32910	P04051	15	26	0.8	0.413793	12
P32801	P22204	5	48	0.8	0.0816327	4
P32657	P14164	10	5	0.8	0.363636	4
P32581	P25656	23	5	0.8	0.166667	4
P32558	P14164	18	5	0.8	0.210526	4
P32354	P29496	7	5	0.8	0.5	4
P32263	P09201	8	5	0.8	0.444444	4
P31116	P16140	5	113	0.8	0.0350877	4
P31116	P14540	5	41	0.8	0.0952381	4
P31116	P06168	5	28	0.8	0.137931	4
P31116	P04385	5	100	0.8	0.039604	4
P30902	P09457	7	5	0.8	0.5	4
P40350	P25358	24	66	0.791667	0.267606	19
Q12102	Q01329	19	19	0.789474	0.652174	15
Q04697	P08456	60	19	0.789474	0.234375	15
P38690	P04173	19	156	0.789474	0.09375	15
Q12377	P40327	30	14	0.785714	0.333333	11
P15992	P07283	113	14	0.785714	0.0948276	11
Q12102	Q06102	19	14	0.785714	0.5	11
Q07508	Q05900	23	14	0.785714	0.423077	11
Q06102	P29468	14	19	0.785714	0.5	11
Q06102	Q01329	14	19	0.785714	0.5	11
Q05900	Q00539	14	22	0.785714	0.44	11
P50944	P49018	28	59	0.785714	0.338462	22
P43621	P41811	14	111	0.785714	0.0964912	11
P43593	P43588	14	24	0.785714	0.407407	11
P43593	P33298	14	83	0.785714	0.127907	11
P40327	P33298	14	83	0.785714	0.127907	11
Q04697	P38286	60	101	0.783333	0.412281	47
P39078	P19882	23	168	0.782609	0.104046	18
Q04697	P16661	60	32	0.78125	0.373134	25
P53176	P38286	32	101	0.78125	0.231481	25
Q12402	P38264	27	109	0.777778	0.182609	21
Q12277	Q08491	9	14	0.777778	0.4375	7
Q12277	P53256	9	16	0.777778	0.388889	7
Q12277	P46948	9	16	0.777778	0.388889	7
Q12245	P30656	9	22	0.777778	0.291667	7
Q12245	P22141	9	44	0.777778	0.152174	7
Q12223	P38953	67	9	0.777778	0.101449	7
Q08004	P53313	60	18	0.777778	0.21875	14
Q07508	P53207	23	18	0.777778	0.518519	14
Q04601	P14724	9	11	0.777778	0.538462	7
Q04601	P53886	9	10	0.777778	0.583333	7
Q04601	P53068	9	10	0.777778	0.583333	7
Q04601	P38042	9	9	0.777778	0.636364	7
Q04437	P38953	110	9	0.777778	0.0625	7
P53875	P36520	9	28	0.777778	0.233333	7
P53845	P53108	18	20	0.777778	0.583333	14
P53829	P34909	13	9	0.777778	0.466667	7
P07262	P00924	18	67	0.777778	0.197183	14
P38987	P38953	163	9	0.777778	0.0424242	7
P38328	P33204	23	9	0.777778	0.28	7
P38042	P09798	9	13	0.777778	0.466667	7
P35723	P31379	51	9	0.777778	0.132075	7
P34909	P25655	9	25	0.777778	0.259259	7
P33204	P32381	9	88	0.777778	0.0777778	7
Q08980	P38353	37	22	0.772727	0.404762	17
P49018	P38353	59	22	0.772727	0.265625	17
P47079	P12612	74	22	0.772727	0.21519	17
P42943	P39076	22	36	0.772727	0.414634	17
P40319	P14906	79	22	0.772727	0.202381	17
P38353	P04817	22	48	0.772727	0.320755	17
P38286	P25358	101	66	0.772727	0.439655	51
P38264	P25358	109	66	0.772727	0.41129	51
Q04697	P36057	60	35	0.771429	0.397059	27
Q12124	P32570	26	31	0.769231	0.540541	20
P15703	P04173	26	156	0.769231	0.123457	20
Q06135	Q04697	13	60	0.769231	0.15873	10
Q06135	P38286	13	101	0.769231	0.0961538	10
P53048	P46961	13	62	0.769231	0.153846	10
P53048	P38842	13	61	0.769231	0.15625	10
P39692	P14742	13	37	0.769231	0.25	10
P39692	P12398	13	175	0.769231	0.0561798	10
P32585	P32569	13	111	0.769231	0.0877193	10
P25635	P25586	64	34	0.764706	0.361111	26
Q06632	Q06224	17	18	0.764706	0.590909	13
Q06632	Q01329	17	19	0.764706	0.565217	13
Q01329	P42073	19	17	0.764706	0.565217	13
P43561	P40319	17	79	0.764706	0.156627	13
P43561	P38286	17	101	0.764706	0.12381	13
P43561	P38264	17	109	0.764706	0.115044	13
P47154	P25358	38	66	0.763158	0.386667	29
Q12450	Q04697	42	60	0.761905	0.457143	32
Q02774	P25358	46	66	0.76087	0.454545	35
Q02774	P38264	46	109	0.76087	0.291667	35
Q02199	P48837	25	39	0.76	0.422222	19
P40548	P35723	41	51	0.756098	0.508197	31
P28834	P04173	20	156	0.75	0.0931677	15
P22141	O13563	44	8	0.75	0.130435	6
P18414	P16661	8	32	0.75	0.176471	6
P18239	P18238	31	12	0.75	0.264706	9
P18238	P00830	12	127	0.75	0.0692308	9
P18238	P12398	12	175	0.75	0.0505618	9
Q99380	P46964	18	8	0.75	0.3	6
Q12522	P25382	48	8	0.75	0.12	6
Q12449	P60010	16	125	0.75	0.0930233	12
Q12449	P04173	16	156	0.75	0.075	12
Q12445	Q03655	20	44	0.75	0.306122	15
Q12445	P53045	20	52	0.75	0.263158	15
Q12389	Q02892	8	27	0.75	0.206897	6
Q12389	P53261	8	39	0.75	0.146341	6
Q12389	P38789	8	26	0.75	0.214286	6
Q12389	P38779	8	29	0.75	0.193548	6
Q12377	O13563	30	8	0.75	0.1875	6
Q12102	P39927	19	12	0.75	0.409091	9
Q12024	P32892	26	8	0.75	0.214286	6
Q12006	Q04697	12	60	0.75	0.142857	9
Q12006	P53337	12	38	0.75	0.219512	9
Q12006	P46956	12	46	0.75	0.183673	9
Q12006	P38286	12	101	0.75	0.0865385	9
Q12006	P36057	12	35	0.75	0.236842	9
Q12006	P35723	12	51	0.75	0.166667	9
P15367	P04817	8	48	0.75	0.12	6
Q08723	O13563	26	8	0.75	0.214286	6
Q07623	P53235	64	8	0.75	0.0909091	6
Q06819	P19735	8	106	0.75	0.0555556	6
Q06819	P36048	8	27	0.75	0.206897	6
Q06224	P35728	18	16	0.75	0.545455	12
Q06103	O13563	15	8	0.75	0.352941	6
Q06078	P15646	8	31	0.75	0.181818	6
Q06078	P42945	8	15	0.75	0.352941	6
Q05636	P53256	18	16	0.75	0.545455	12
Q04697	P18414	60	8	0.75	0.0967742	6
Q04697	P47026	60	8	0.75	0.0967742	6
Q04697	P40478	60	8	0.75	0.0967742	6
Q04697	P40350	60	24	0.75	0.272727	18
Q04697	P40319	60	79	0.75	0.478723	45
Q04120	P54115	8	49	0.75	0.117647	6
Q04067	P40217	15	12	0.75	0.5	9
Q04062	O13563	22	8	0.75	0.25	6
Q03338	P20053	12	37	0.75	0.225	9
Q03338	P49704	12	31	0.75	0.264706	9
Q03338	P36048	12	27	0.75	0.3	9
Q02892	P32892	27	8	0.75	0.206897	6
Q02795	P40890	33	8	0.75	0.171429	6
Q02774	P18414	46	8	0.75	0.125	6
Q02354	P25635	8	64	0.75	0.0909091	6
Q02354	P15646	8	31	0.75	0.181818	6
Q02354	P53914	8	28	0.75	0.2	6
Q01939	O13563	50	8	0.75	0.115385	6
P87284	P25358	16	66	0.75	0.171429	12
P87284	P38286	16	101	0.75	0.114286	12
P87284	P35723	16	51	0.75	0.218182	12
P54784	P32833	11	8	0.75	0.461538	6
P53933	P38257	37	8	0.75	0.153846	6
P53927	P25382	30	8	0.75	0.1875	6
P53549	O13563	21	8	0.75	0.26087	6
P53386	P38286	12	101	0.75	0.0865385	9
P53337	P40478	38	8	0.75	0.15	6
P53256	P46948	16	16	0.75	0.6	12
P53256	P38792	16	12	0.75	0.473684	9
P53196	O13563	39	8	0.75	0.146341	6
P53176	P40319	32	79	0.75	0.275862	24
P53176	P38264	32	109	0.75	0.205128	24
P53045	P50944	52	28	0.75	0.355932	21
P50944	P46961	28	62	0.75	0.304348	21
P48510	P32628	8	35	0.75	0.162162	6
P48439	P46964	10	8	0.75	0.5	6
P47154	P47026	38	8	0.75	0.15	6
P47154	P40478	38	8	0.75	0.15	6
P47122	P02557	12	84	0.75	0.103448	9
P47083	P25635	8	64	0.75	0.0909091	6
P47083	P38333	8	33	0.75	0.171429	6
P47026	P25358	8	66	0.75	0.0882353	6
P47026	P16661	8	32	0.75	0.176471	6
P47026	P40319	8	79	0.75	0.0740741	6
P47026	P39540	8	31	0.75	0.181818	6
P47026	P38842	8	61	0.75	0.0952381	6
P47026	P38286	8	101	0.75	0.0582524	6
P47026	P38264	8	109	0.75	0.0540541	6
P47026	P36057	8	35	0.75	0.162162	6
P47026	P35723	8	51	0.75	0.113208	6
P46964	P41543	8	20	0.75	0.272727	6
P46964	P33767	8	39	0.75	0.146341	6
P46961	P41815	62	8	0.75	0.09375	6
P42841	P39927	26	12	0.75	0.310345	9
P42073	P39927	17	12	0.75	0.45	9
P41695	P24719	8	40	0.75	0.142857	6
P41543	P39007	20	8	0.75	0.272727	6
P40890	P33767	8	39	0.75	0.146341	6
P40548	P40478	41	8	0.75	0.139535	6
P40548	P40350	41	24	0.75	0.382979	18
P40480	P25357	9	8	0.75	0.545455	6
P40478	P25358	8	66	0.75	0.0882353	6
P40478	P40350	8	24	0.75	0.230769	6
P40440	P38729	8	42	0.75	0.136364	6
P40327	O13563	14	8	0.75	0.375	6
P40319	P16661	79	32	0.75	0.275862	24
P07251	P05626	109	8	0.75	0.0540541	6
P40016	O13563	18	8	0.75	0.3	6
P39927	P29468	12	19	0.75	0.409091	9
P39927	P25298	12	22	0.75	0.36	9
P39744	P32892	15	8	0.75	0.352941	6
P39705	P32499	12	19	0.75	0.409091	9
P39007	P33767	8	39	0.75	0.146341	6
P38987	P32863	163	24	0.75	0.106509	18
P38886	O13563	37	8	0.75	0.153846	6
P38842	P38356	61	36	0.75	0.385714	27
P06168	P04173	28	156	0.75	0.128834	21
P38264	P16661	109	32	0.75	0.205128	24
P38262	P25357	29	8	0.75	0.193548	6
P05694	P04807	37	12	0.75	0.225	9
P35728	P29468	16	19	0.75	0.521739	12
P35723	P18414	51	8	0.75	0.113208	6
P04807	P04806	12	95	0.75	0.0918367	9
P33299	O13563	32	8	0.75	0.176471	6
P32833	P09119	8	11	0.75	0.461538	6
P32827	P0C0X0	8	9	0.75	0.545455	6
P32628	O13563	35	8	0.75	0.162162	6
P32496	O13563	26	8	0.75	0.214286	6
Q04697	P35723	60	51	0.745098	0.520548	38
P40548	P36057	41	35	0.742857	0.52	26
P36057	P35723	35	51	0.742857	0.433333	26
P39540	P38842	31	61	0.741935	0.333333	23
Q12402	P25358	27	66	0.740741	0.273973	20
Q12402	P38286	27	101	0.740741	0.185185	20
P46961	P38992	62	27	0.740741	0.289855	20
Q04437	P32581	110	23	0.73913	0.146552	17
P39078	P39076	23	36	0.73913	0.404762	17
Q08975	Q08224	42	93	0.738095	0.298077	31
Q12102	P29468	19	19	0.736842	0.583333	14
Q01329	P29468	19	19	0.736842	0.583333	14
P47154	P08456	38	19	0.736842	0.325581	14
P47154	P40319	38	79	0.736842	0.314607	28
P40548	P08456	41	19	0.736842	0.304348	14
P40319	P08456	79	19	0.736842	0.166667	14
P40204	P38282	33	19	0.736842	0.368421	14
P35723	P08456	51	19	0.736842	0.25	14
P40319	P38264	79	109	0.734177	0.446154	58
Q12372	P46965	15	40	0.733333	0.25	11
Q12372	P33767	15	39	0.733333	0.255814	11
Q12309	P32523	23	15	0.733333	0.407407	11
Q04697	P38703	60	15	0.733333	0.171875	11
Q04437	P38319	110	15	0.733333	0.0964912	11
P53927	P36160	30	45	0.733333	0.415094	22
P40413	P19882	15	168	0.733333	0.0639535	11
P07244	P04173	15	156	0.733333	0.06875	11
P38703	P25358	15	66	0.733333	0.157143	11
P38703	P35723	15	51	0.733333	0.2	11
P38428	P25358	15	66	0.733333	0.157143	11
P38319	P14681	15	76	0.733333	0.1375	11
P35718	P07703	15	126	0.733333	0.0846154	11
P35718	P04051	15	26	0.733333	0.366667	11
P40991	P38789	58	26	0.730769	0.292308	19
P09734	P09733	37	78	0.72973	0.306818	27
P09734	P02557	37	84	0.72973	0.287234	27
Q12440	P14724	13	11	0.727273	0.5	8
P16522	P14724	25	11	0.727273	0.285714	8
Q12223	P53916	67	11	0.727273	0.114286	8
Q12223	P36009	67	11	0.727273	0.114286	8
Q08986	Q03655	22	44	0.727273	0.32	16
Q06164	P26755	11	41	0.727273	0.181818	8
Q06164	P38987	11	163	0.727273	0.0481928	8
Q04660	P40693	72	11	0.727273	0.106667	8
Q04437	P53916	110	11	0.727273	0.0707965	8
Q04062	Q01939	22	50	0.727273	0.285714	16
Q03655	P38842	44	61	0.727273	0.438356	32
Q03655	P38353	44	22	0.727273	0.32	16
P53927	P40693	30	11	0.727273	0.242424	8
P53916	P41811	11	111	0.727273	0.0701754	8
P53879	P19735	11	106	0.727273	0.0733945	8
P53622	P41810	51	11	0.727273	0.148148	8
P53323	P36009	57	11	0.727273	0.133333	8
P50944	P38353	28	22	0.727273	0.470588	16
P47117	P32381	11	88	0.727273	0.0879121	8
P42943	P19882	22	168	0.727273	0.091954	16
P41810	P32074	11	16	0.727273	0.421053	8
P40991	P40693	58	11	0.727273	0.131148	8
P40693	P38779	11	29	0.727273	0.25	8
P40693	P36160	11	45	0.727273	0.166667	8
P40303	P23638	12	11	0.727273	0.533333	8
P40302	P23638	16	11	0.727273	0.421053	8
P39682	P34160	11	39	0.727273	0.190476	8
P39682	P33203	11	14	0.727273	0.470588	8
P38842	P38353	61	22	0.727273	0.238806	16
P38782	P38304	11	16	0.727273	0.421053	8
P38286	P14906	101	22	0.727273	0.149533	16
P36009	P26188	11	52	0.727273	0.145455	8
P36009	P14681	11	76	0.727273	0.101266	8
P32570	P19659	31	22	0.727273	0.432432	16
Q12377	P40016	30	18	0.722222	0.371429	13
Q12102	Q06224	19	18	0.722222	0.541667	13
Q06224	Q01329	18	19	0.722222	0.541667	13
Q01939	P40016	50	18	0.722222	0.236364	13
P53207	P34160	18	39	0.722222	0.295455	13
P47079	P39079	74	18	0.722222	0.164557	13
P40016	P33298	18	83	0.722222	0.147727	13
P39079	P19882	18	168	0.722222	0.0751445	13
P43639	P15790	25	76	0.72	0.216867	18
P38708	P19882	25	168	0.72	0.102857	18
P09733	P02557	78	84	0.717949	0.528302	56
P27801	P12868	19	7	0.714286	0.238095	5
P25648	P19263	7	10	0.714286	0.416667	5
P23624	P23291	7	75	0.714286	0.0649351	5
P22211	P08018	7	30	0.714286	0.15625	5
P20795	P12868	8	7	0.714286	0.5	5
P20484	P15790	7	76	0.714286	0.0641026	5
P20436	P20434	14	17	0.714286	0.47619	10
Q92316	Q02795	7	33	0.714286	0.142857	5
Q92316	P39007	7	8	0.714286	0.5	5
Q12522	P38805	48	7	0.714286	0.1	5
Q12450	P25358	42	66	0.714286	0.384615	30
Q12450	P39552	42	7	0.714286	0.113636	5
Q12450	P35723	42	51	0.714286	0.47619	30
Q12420	Q12368	16	7	0.714286	0.277778	5
Q12417	Q12046	22	7	0.714286	0.208333	5
Q12368	P19735	7	106	0.714286	0.0462963	5
Q12368	P36048	7	27	0.714286	0.172414	5
Q12343	P25648	23	7	0.714286	0.2	5
Q12309	Q12046	23	7	0.714286	0.2	5
Q12272	P53861	7	38	0.714286	0.125	5
Q12176	P38805	28	7	0.714286	0.166667	5
Q12158	P40541	7	8	0.714286	0.5	5
Q12046	Q04048	7	16	0.714286	0.277778	5
Q12046	P53131	7	22	0.714286	0.208333	5
Q12046	P36048	7	27	0.714286	0.172414	5
Q12046	P32523	7	15	0.714286	0.294118	5
Q08387	P38805	23	7	0.714286	0.2	5
Q08271	P54862	27	7	0.714286	0.172414	5
Q07904	P28496	7	27	0.714286	0.172414	5
Q07904	P16661	7	32	0.714286	0.147059	5
Q07904	P53045	7	52	0.714286	0.0925926	5
Q07904	P46961	7	62	0.714286	0.078125	5
Q07904	P39540	7	31	0.714286	0.151515	5
Q07904	P38992	7	27	0.714286	0.172414	5
Q07904	P38298	7	34	0.714286	0.138889	5
Q07904	P38264	7	109	0.714286	0.045045	5
Q07904	P04817	7	48	0.714286	0.1	5
Q07657	P53890	38	7	0.714286	0.125	5
Q07623	P20484	64	7	0.714286	0.0757576	5
Q06704	P18851	7	59	0.714286	0.0819672	5
Q06632	Q06102	17	14	0.714286	0.47619	10
Q06406	P49960	21	7	0.714286	0.217391	5
Q06102	P35728	14	16	0.714286	0.5	10
Q06091	P28004	7	22	0.714286	0.208333	5
Q06091	P32523	7	15	0.714286	0.294118	5
Q05900	Q00916	14	67	0.714286	0.140845	10
Q05900	P40204	14	33	0.714286	0.27027	10
Q05900	P34160	14	39	0.714286	0.232558	10
Q05775	P40217	7	12	0.714286	0.357143	5
Q05775	P38431	7	22	0.714286	0.208333	5
Q05775	P38249	7	21	0.714286	0.217391	5
Q05775	P32497	7	20	0.714286	0.227273	5
Q04697	P39552	60	7	0.714286	0.0806452	5
Q04675	P40328	80	7	0.714286	0.0609756	5
Q04651	P46961	14	62	0.714286	0.151515	10
Q03308	P20795	7	8	0.714286	0.5	5
Q03308	P12868	7	7	0.714286	0.555556	5
Q02892	P33201	27	7	0.714286	0.172414	5
P12398	P07283	175	14	0.714286	0.0558659	10
Q02795	P54862	33	7	0.714286	0.142857	5
P80667	P40155	20	7	0.714286	0.227273	5
P57743	P49960	29	7	0.714286	0.16129	5
P54862	P53045	7	52	0.714286	0.0925926	5
P54862	P04817	7	48	0.714286	0.1	5
P54790	P54784	7	11	0.714286	0.384615	5
P54790	P50874	7	7	0.714286	0.555556	5
P54790	P09119	7	11	0.714286	0.384615	5
P54790	P38826	7	7	0.714286	0.555556	5
P54790	P32833	7	8	0.714286	0.5	5
P54784	P50874	11	7	0.714286	0.384615	5
P53905	P49960	22	7	0.714286	0.208333	5
P53685	P53096	8	7	0.714286	0.5	5
P53261	P36049	39	7	0.714286	0.121951	5
P53127	P14681	7	76	0.714286	0.0641026	5
P53127	P07703	7	126	0.714286	0.0390625	5
P53127	P38987	7	163	0.714286	0.030303	5
P53127	P32381	7	88	0.714286	0.0555556	5
P53127	P32328	7	30	0.714286	0.15625	5
P53112	P40155	17	7	0.714286	0.263158	5
P53096	P36124	7	8	0.714286	0.5	5
P50874	P09119	7	11	0.714286	0.384615	5
P50874	P38826	7	7	0.714286	0.555556	5
P50874	P32833	7	8	0.714286	0.5	5
P49960	P47093	7	75	0.714286	0.0649351	5
P49960	P40089	7	36	0.714286	0.131579	5
P49960	P38203	7	73	0.714286	0.0666667	5
P48836	P32366	7	95	0.714286	0.0515464	5
P43593	P32628	14	35	0.714286	0.25641	10
P42935	P38874	8	7	0.714286	0.5	5
P41895	P08518	7	44	0.714286	0.108696	5
P41895	P04050	7	38	0.714286	0.125	5
P41811	P36005	111	7	0.714286	0.0442478	5
P07560	P01123	7	25	0.714286	0.185185	5
P40991	P38805	58	7	0.714286	0.0833333	5
P40548	P39552	41	7	0.714286	0.116279	5
P40328	P29295	7	85	0.714286	0.0574713	5
P40327	P38886	14	37	0.714286	0.243902	10
P40327	P33299	14	32	0.714286	0.277778	10
P40319	P39552	79	7	0.714286	0.0617284	5
P40055	P32899	49	7	0.714286	0.0980392	5
P39744	P36049	15	7	0.714286	0.294118	5
P39552	P38286	7	101	0.714286	0.0485437	5
P39552	P35723	7	51	0.714286	0.0943396	5
P38987	P23624	163	7	0.714286	0.030303	5
P38805	P38112	7	20	0.714286	0.227273	5
P38805	P37838	7	38	0.714286	0.125	5
P38782	P25648	11	7	0.714286	0.384615	5
P38779	P36049	29	7	0.714286	0.16129	5
P38555	P07560	14	7	0.714286	0.3125	5
P38304	P25648	16	7	0.714286	0.277778	5
P38130	P14359	12	7	0.714286	0.357143	5
P38122	P32263	7	8	0.714286	0.5	5
P36160	P33201	45	7	0.714286	0.106383	5
P36005	P26188	7	52	0.714286	0.0925926	5
P36005	P18851	7	59	0.714286	0.0819672	5
P36005	P07703	7	126	0.714286	0.0390625	5
P34162	P25648	31	7	0.714286	0.151515	5
P32569	P25648	111	7	0.714286	0.0442478	5
P32328	P23624	30	7	0.714286	0.15625	5
P32327	P29311	7	86	0.714286	0.0568182	5
P32327	P00924	7	67	0.714286	0.0724638	5
P32327	P15108	7	52	0.714286	0.0925926	5
P32327	P11484	7	48	0.714286	0.1	5
P32327	P04173	7	156	0.714286	0.0316456	5
P30902	P00854	7	7	0.714286	0.555556	5
P30902	P00830	7	127	0.714286	0.0387597	5
P53337	P40548	38	41	0.710526	0.519231	27
P53337	P35723	38	51	0.710526	0.435484	27
P12398	P09435	175	31	0.709677	0.119565	22
Q06644	Q03655	24	44	0.708333	0.333333	17
Q06644	P46961	24	62	0.708333	0.246377	17
P53337	P40350	38	24	0.708333	0.377778	17
P40350	P35723	24	51	0.708333	0.293103	17
P32863	P07703	24	126	0.708333	0.12782	17
Q12450	P43561	42	17	0.705882	0.255319	12
Q12102	P42073	19	17	0.705882	0.5	12
Q08208	P04147	17	62	0.705882	0.179104	12
Q08162	Q05636	17	18	0.705882	0.521739	12
Q06632	P29468	17	19	0.705882	0.5	12
Q06217	P43321	17	43	0.705882	0.25	12
Q04697	P43561	60	17	0.705882	0.184615	12
P45976	P42073	18	17	0.705882	0.521739	12
P43561	P25358	17	66	0.705882	0.169014	12
P04173	P00360	156	44	0.704545	0.183432	31
Q12402	P40548	27	41	0.703704	0.387755	19
Q12402	P35723	27	51	0.703704	0.322034	19
P15108	P05694	52	37	0.702703	0.412698	26
P26188	P25347	52	10	0.7	0.127273	7
P25846	P06839	10	63	0.7	0.106061	7
P25347	P07703	10	126	0.7	0.0542636	7
P23642	P20604	20	77	0.7	0.168675	14
Q12522	P53136	48	10	0.7	0.137255	7
Q12450	P32842	42	10	0.7	0.155556	7
Q12446	P25347	68	10	0.7	0.0985915	7
Q12446	P05066	68	10	0.7	0.0985915	7
Q12445	P38842	20	61	0.7	0.208955	14
Q12445	P04817	20	48	0.7	0.259259	14
Q12377	P33299	30	32	0.7	0.512195	21
Q12377	P33298	30	83	0.7	0.228261	21
Q12149	P53256	10	16	0.7	0.368421	7
Q12149	P38792	10	12	0.7	0.466667	7
Q08649	P43572	13	10	0.7	0.4375	7
Q08235	P38779	10	29	0.7	0.21875	7
Q05900	Q03782	14	10	0.7	0.411765	7
Q04697	P25358	60	66	0.7	0.5	42
Q04437	P25347	110	10	0.7	0.0619469	7
Q04437	P53541	110	10	0.7	0.0619469	7
Q04373	P34241	20	10	0.7	0.304348	7
Q04226	P53040	10	32	0.7	0.2	7
Q04183	P36149	11	10	0.7	0.5	7
Q03782	Q00539	10	22	0.7	0.28	7
Q03782	P39682	10	11	0.7	0.5	7
Q03782	P33203	10	14	0.7	0.411765	7
Q03761	P46677	10	31	0.7	0.205882	7
Q03532	P53136	25	10	0.7	0.25	7
P53978	P19882	10	168	0.7	0.0409357	7
P53886	P09798	10	13	0.7	0.4375	7
P53541	P32381	10	88	0.7	0.0769231	7
P53261	P53136	39	10	0.7	0.166667	7
P53108	P53093	20	21	0.7	0.518519	14
P53068	P09798	10	13	0.7	0.4375	7
P49955	P36048	10	27	0.7	0.233333	7
P47822	P34162	10	31	0.7	0.205882	7
P46956	P32842	46	10	0.7	0.142857	7
P41811	P25846	111	10	0.7	0.0614035	7
P40078	P36160	20	45	0.7	0.27451	14
P40036	P32598	10	89	0.7	0.076087	7
P39984	P07703	20	126	0.7	0.106061	14
P39014	P25846	34	10	0.7	0.189189	7
P38987	P25347	163	10	0.7	0.0421687	7
P38842	P35206	61	40	0.7	0.383562	28
P38316	P25347	91	10	0.7	0.0744681	7
P38316	P05066	91	10	0.7	0.0744681	7
P36161	P35729	10	15	0.7	0.388889	7
P32787	P10080	10	33	0.7	0.194444	7
P32501	P14741	10	83	0.7	0.0813953	7
P32501	P09032	10	12	0.7	0.466667	7
P32381	P25846	88	10	0.7	0.0769231	7
P32381	P25347	88	10	0.7	0.0769231	7
P14741	P12754	83	23	0.695652	0.177778	16
P32581	P14681	23	76	0.695652	0.192771	16
P49018	P38356	59	36	0.694444	0.357143	25
Q12477	Q04437	13	110	0.692308	0.0789474	9
Q12450	Q06135	42	13	0.692308	0.195652	9
Q12440	P16522	13	25	0.692308	0.310345	9
P16522	P09798	25	13	0.692308	0.310345	9
P15703	P02557	26	84	0.692308	0.195652	18
Q12021	P18851	13	59	0.692308	0.142857	9
Q12021	Q00362	13	48	0.692308	0.173077	9
Q12021	P32641	13	43	0.692308	0.191489	9
Q06135	P46956	13	46	0.692308	0.18	9
Q03655	P53954	44	13	0.692308	0.1875	9
P53954	P53045	13	52	0.692308	0.160714	9
P53954	P50944	13	28	0.692308	0.28125	9
P53954	P49018	13	59	0.692308	0.142857	9
P53954	P39540	13	31	0.692308	0.257143	9
P53954	P38723	13	46	0.692308	0.18	9
P53954	P38353	13	22	0.692308	0.346154	9
P53048	P53045	13	52	0.692308	0.160714	9
P46677	P11747	31	13	0.692308	0.257143	9
P46367	P16140	39	113	0.692308	0.216	27
P39692	P19882	13	168	0.692308	0.0523256	9
P39692	P16140	13	113	0.692308	0.0769231	9
P39692	P15992	13	113	0.692308	0.0769231	9
P39692	P11484	13	48	0.692308	0.173077	9
P39692	P09733	13	78	0.692308	0.109756	9
P38789	P36160	26	45	0.692308	0.339623	18
P38264	P25580	109	13	0.692308	0.079646	9
P37296	P32563	15	13	0.692308	0.473684	9
P34162	P32585	31	13	0.692308	0.257143	9
P32585	P32570	13	31	0.692308	0.257143	9
P60010	P25303	125	29	0.689655	0.149254	20
P25358	P16661	66	32	0.6875	0.289474	22
Q12420	P36048	16	27	0.6875	0.34375	11
Q12347	Q08273	16	73	0.6875	0.141026	11
Q12347	Q04437	16	110	0.6875	0.0956522	11
Q08162	P46948	17	16	0.6875	0.5	11
Q07824	Q07376	37	16	0.6875	0.261905	11
Q07376	P35206	16	40	0.6875	0.244444	11
Q04697	P53176	60	32	0.6875	0.314286	22
Q02774	P87284	46	16	0.6875	0.215686	11
P87284	P38264	16	109	0.6875	0.0964912	11
P47079	P39077	74	16	0.6875	0.139241	11
P46956	P16661	46	32	0.6875	0.392857	22
P42841	P35728	26	16	0.6875	0.354839	11
P42073	P35728	17	16	0.6875	0.5	11
P40354	P29295	16	85	0.6875	0.122222	11
P40354	P07703	16	126	0.6875	0.0839695	11
P39077	P19882	16	168	0.6875	0.0635838	11
P25385	P22804	26	19	0.684211	0.40625	13
Q99190	P46961	38	62	0.684211	0.351351	26
Q12450	P08456	42	19	0.684211	0.270833	13
Q06142	Q02821	57	209	0.684211	0.171806	39
Q04697	P47154	60	38	0.684211	0.361111	26
Q02774	P08456	46	19	0.684211	0.25	13
P46956	P08456	46	19	0.684211	0.25	13
P39925	P19735	19	106	0.684211	0.116071	13
P38690	P19882	19	168	0.684211	0.0747126	13
P32610	P16140	19	113	0.684211	0.109244	13
Q04697	P38264	60	109	0.683333	0.320312	41
P19882	P12612	168	22	0.681818	0.0857143	15
Q08986	P49018	22	59	0.681818	0.227273	15
Q08986	P46961	22	62	0.681818	0.217391	15
Q08986	P04817	22	48	0.681818	0.272727	15
Q03558	P60010	22	125	0.681818	0.113636	15
P53322	P38353	38	22	0.681818	0.333333	15
P46965	P38353	40	22	0.681818	0.319149	15
P38356	P38353	36	22	0.681818	0.348837	15
P38353	P33767	22	39	0.681818	0.326087	15
P38264	P14906	109	22	0.681818	0.12931	15
Q12380	P19735	25	106	0.68	0.149123	17
P46965	P38843	40	25	0.68	0.354167	17
P46961	P38843	62	25	0.68	0.242857	17
P38843	P38842	25	61	0.68	0.246377	17
P34164	P32381	25	88	0.68	0.177083	17
P14540	P06168	41	28	0.678571	0.38	19
Q03655	P50944	44	28	0.678571	0.358491	19
Q12152	Q04437	31	110	0.677419	0.175	21
P12398	P07342	175	31	0.677419	0.113514	21
P09435	P04173	31	156	0.677419	0.126506	21
P04173	P00358	156	31	0.677419	0.126506	21
P38842	P38298	61	34	0.676471	0.319444	23
P30657	P25451	14	9	0.666667	0.352941	6
P30656	P25451	22	9	0.666667	0.24	6
P25659	P25491	6	103	0.666667	0.0380952	4
P25659	P12398	6	175	0.666667	0.0225989	4
P25621	P16151	6	41	0.666667	0.0930233	4
P25621	P04817	6	48	0.666667	0.08	4
P25615	P06839	12	63	0.666667	0.119403	8
P25515	P23968	12	33	0.666667	0.216216	8
P25451	P23639	9	31	0.666667	0.176471	6
P25451	P23638	9	11	0.666667	0.428571	6
P25451	P22141	9	44	0.666667	0.12766	6
P25441	P22276	6	12	0.666667	0.285714	4
P25441	P20436	6	14	0.666667	0.25	4
P25441	P20434	6	17	0.666667	0.210526	4
P25441	P07703	6	126	0.666667	0.03125	4
P25441	P04051	6	26	0.666667	0.142857	4
P25389	P12709	6	120	0.666667	0.0327869	4
P25376	P21147	36	6	0.666667	0.105263	4
P23968	P19145	33	6	0.666667	0.114286	4
P22215	P16661	6	32	0.666667	0.117647	4
P21147	P04817	6	48	0.666667	0.08	4
P19882	P00445	168	9	0.666667	0.0350877	6
P19882	P07806	168	12	0.666667	0.0465116	8
P19145	P04817	6	48	0.666667	0.08	4
Q99380	P38286	18	101	0.666667	0.11215	12
Q99278	P25648	6	7	0.666667	0.444444	4
Q99278	P19880	6	14	0.666667	0.25	4
Q99278	P19263	6	10	0.666667	0.333333	4
Q99278	Q12343	6	23	0.666667	0.16	4
Q99278	Q12321	6	6	0.666667	0.5	4
Q99278	Q08278	6	32	0.666667	0.117647	4
Q99278	P53114	6	6	0.666667	0.5	4
Q99278	P39073	6	18	0.666667	0.2	4
Q99278	P38931	6	13	0.666667	0.266667	4
Q99278	P33308	6	10	0.666667	0.333333	4
Q99278	P32569	6	111	0.666667	0.0353982	4
Q99278	P32259	6	27	0.666667	0.137931	4
Q99207	P15646	6	31	0.666667	0.121212	4
Q99207	Q06287	6	19	0.666667	0.190476	4
Q99207	Q04217	6	10	0.666667	0.333333	4
Q99207	Q02354	6	8	0.666667	0.4	4
Q99207	P53914	6	28	0.666667	0.133333	4
Q99207	P47083	6	8	0.666667	0.4	4
Q99207	P40055	6	49	0.666667	0.0784314	4
Q99207	P35194	6	22	0.666667	0.166667	4
Q99207	P32899	6	7	0.666667	0.444444	4
Q99190	P53386	38	12	0.666667	0.190476	8
Q99189	Q06142	9	57	0.666667	0.1	6
Q99189	Q02821	9	209	0.666667	0.0283019	6
Q99189	P30822	9	64	0.666667	0.0895522	6
Q12514	P34909	12	9	0.666667	0.4	6
Q12510	P18851	9	59	0.666667	0.0967742	6
Q12510	Q00362	9	48	0.666667	0.117647	6
Q12510	P39108	9	53	0.666667	0.107143	6
Q12510	P38129	9	46	0.666667	0.122449	6
Q12510	P36130	9	33	0.666667	0.166667	6
Q12505	P22133	6	28	0.666667	0.133333	4
Q12450	Q12006	42	12	0.666667	0.173913	8
Q12450	P40350	42	24	0.666667	0.32	16
Q12450	P39551	42	9	0.666667	0.133333	6
Q12420	Q03338	16	12	0.666667	0.4	8
Q12377	Q12250	30	46	0.666667	0.357143	20
Q12377	P38886	30	37	0.666667	0.425532	20
Q12372	P25376	15	36	0.666667	0.243902	10
Q12372	P21147	15	6	0.666667	0.235294	4
Q12372	Q03655	15	44	0.666667	0.204082	10
Q12372	P53045	15	52	0.666667	0.175439	10
Q12372	P49018	15	59	0.666667	0.15625	10
Q12372	P46961	15	62	0.666667	0.149254	10
Q12372	P38993	15	36	0.666667	0.243902	10
Q12372	P38842	15	61	0.666667	0.151515	10
Q12372	P38723	15	46	0.666667	0.196078	10
Q12372	P38356	15	36	0.666667	0.243902	10
Q12372	P38298	15	34	0.666667	0.25641	10
Q12372	P04817	15	48	0.666667	0.188679	10
Q12372	P35206	15	40	0.666667	0.222222	10
Q12372	P32803	15	45	0.666667	0.2	10
Q12372	P32465	15	9	0.666667	0.333333	6
Q12343	Q06213	23	6	0.666667	0.16	4
Q12343	P53114	23	6	0.666667	0.16	4
Q12343	P40356	23	6	0.666667	0.16	4
P16474	P08524	65	6	0.666667	0.0597015	4
P16474	P04807	65	12	0.666667	0.115942	8
Q12321	P19659	6	22	0.666667	0.166667	4
Q12321	Q08278	6	32	0.666667	0.117647	4
Q12321	P53114	6	6	0.666667	0.5	4
Q12321	P47822	6	10	0.666667	0.333333	4
Q12321	P40356	6	6	0.666667	0.5	4
Q12321	P38931	6	13	0.666667	0.266667	4
Q12321	P33308	6	10	0.666667	0.333333	4
Q12277	P25359	9	9	0.666667	0.5	6
Q12277	Q12149	9	10	0.666667	0.461538	6
Q12277	Q08285	9	6	0.666667	0.363636	4
Q12277	Q08162	9	17	0.666667	0.3	6
Q12277	Q05636	9	18	0.666667	0.285714	6
Q12277	Q02821	9	209	0.666667	0.0283019	6
Q12277	P53859	9	12	0.666667	0.4	6
Q12277	P48240	9	11	0.666667	0.428571	6
Q12223	Q05498	67	6	0.666667	0.057971	4
Q12149	P25359	10	9	0.666667	0.461538	6
Q12149	Q08285	10	6	0.666667	0.333333	4
Q12107	P14724	9	11	0.666667	0.428571	6
Q12107	P53886	9	10	0.666667	0.461538	6
Q12107	P53068	9	10	0.666667	0.461538	6
Q12107	P38042	9	9	0.666667	0.5	6
Q12083	P26188	15	52	0.666667	0.175439	10
Q12083	Q04437	15	110	0.666667	0.0869565	10
Q12083	P38987	15	163	0.666667	0.0595238	10
Q12071	P36116	6	7	0.666667	0.444444	4
Q12060	Q12030	6	33	0.666667	0.114286	4
Q12060	Q02336	6	30	0.666667	0.125	4
Q12060	P53040	6	32	0.666667	0.117647	4
Q12024	P43586	26	6	0.666667	0.142857	4
Q12006	P16661	12	32	0.666667	0.222222	8
Q08986	P21147	22	6	0.666667	0.166667	4
Q08986	P19145	22	6	0.666667	0.166667	4
Q08980	P21147	37	6	0.666667	0.102564	4
Q08980	P40885	37	6	0.666667	0.102564	4
Q08963	P36048	12	27	0.666667	0.258065	8
Q08920	P34160	21	39	0.666667	0.304348	14
Q08773	P53125	11	6	0.666667	0.307692	4
Q08723	P40016	26	18	0.666667	0.375	12
P15180	P04806	6	95	0.666667	0.0412371	4
Q08491	P25359	14	9	0.666667	0.352941	6
Q08491	Q08285	14	6	0.666667	0.25	4
P15108	P04807	52	12	0.666667	0.142857	8
Q08285	P25359	6	9	0.666667	0.363636	4
Q08285	Q02821	6	209	0.666667	0.0189573	4
Q08285	P53859	6	12	0.666667	0.285714	4
Q08285	P53256	6	16	0.666667	0.222222	4
Q08285	P48240	6	11	0.666667	0.307692	4
Q08285	P38792	6	12	0.666667	0.285714	4
Q08278	Q06213	32	6	0.666667	0.117647	4
Q08278	P40356	32	6	0.666667	0.117647	4
Q08273	P38634	73	6	0.666667	0.0533333	4
Q08224	P54964	93	6	0.666667	0.0421053	4
Q08162	P25359	17	9	0.666667	0.3	6
Q07896	Q03532	6	25	0.666667	0.148148	4
Q07896	Q02892	6	27	0.666667	0.137931	4
Q07896	P53261	6	39	0.666667	0.097561	4
Q07896	P40991	6	58	0.666667	0.0666667	4
Q07896	P38789	6	26	0.666667	0.142857	4
Q07824	P25621	37	6	0.666667	0.102564	4
Q07824	P21147	37	6	0.666667	0.102564	4
Q07824	P19145	37	6	0.666667	0.102564	4
Q07824	P32465	37	9	0.666667	0.15	6
Q07786	P35497	6	7	0.666667	0.444444	4
Q07657	P25389	38	6	0.666667	0.1	4
P14741	P09032	83	12	0.666667	0.091954	8
Q07468	P12868	6	7	0.666667	0.444444	4
Q07376	P19145	16	6	0.666667	0.222222	4
Q06706	Q04868	12	6	0.666667	0.285714	4
Q06706	Q02908	12	6	0.666667	0.285714	4
Q06678	Q04599	6	6	0.666667	0.5	4
Q06675	P40969	40	6	0.666667	0.0952381	4
Q06644	P49018	24	59	0.666667	0.238806	16
Q06644	P32465	24	9	0.666667	0.222222	6
Q06632	P39927	17	12	0.666667	0.380952	8
Q06631	P53914	6	28	0.666667	0.133333	4
Q06488	P21576	6	16	0.666667	0.222222	4
Q06451	P19145	24	6	0.666667	0.153846	4
Q06451	P46961	24	62	0.666667	0.228571	16
Q06451	P32465	24	9	0.666667	0.222222	6
Q06405	P81450	6	6	0.666667	0.5	4
Q06405	P30902	6	7	0.666667	0.444444	4
Q06224	P29468	18	19	0.666667	0.48	12
Q06213	P38782	6	11	0.666667	0.307692	4
Q06213	P38304	6	16	0.666667	0.222222	4
Q06213	P33308	6	10	0.666667	0.333333	4
Q06213	P32569	6	111	0.666667	0.0353982	4
Q06160	P23201	6	16	0.666667	0.222222	4
Q06144	P25045	6	8	0.666667	0.4	4
Q06142	Q02932	57	6	0.666667	0.0677966	4
Q06103	Q01939	15	50	0.666667	0.181818	10
Q06103	P43588	15	24	0.666667	0.344828	10
Q06103	P40016	15	18	0.666667	0.434783	10
Q06103	P33298	15	83	0.666667	0.113636	10
Q06102	P39927	14	12	0.666667	0.444444	8
Q06091	P38241	7	6	0.666667	0.444444	4
Q05933	P32381	9	88	0.666667	0.0659341	6
Q05636	P25359	18	9	0.666667	0.285714	6
Q05636	P38792	18	12	0.666667	0.363636	8
Q05568	Q04370	6	8	0.666667	0.4	4
Q05568	P39718	6	6	0.666667	0.5	4
Q05498	P26188	6	52	0.666667	0.0740741	4
Q05498	P25846	6	10	0.666667	0.333333	4
Q05498	P20604	6	77	0.666667	0.0506329	4
Q05498	P18851	6	59	0.666667	0.0655738	4
Q05498	Q04437	6	110	0.666667	0.0357143	4
Q05498	Q00776	6	44	0.666667	0.0869565	4
Q05498	P53323	6	57	0.666667	0.0677966	4
Q05498	P41735	6	13	0.666667	0.266667	4
Q05498	P39014	6	34	0.666667	0.111111	4
Q05498	P06701	6	31	0.666667	0.121212	4
Q05016	P00950	12	89	0.666667	0.0860215	8
Q04868	Q02908	6	6	0.666667	0.5	4
Q04868	P42935	6	8	0.666667	0.4	4
Q04868	P38874	6	7	0.666667	0.444444	4
Q04697	P53835	60	6	0.666667	0.0645161	4
Q04697	P53386	60	12	0.666667	0.125	8
Q04660	P43586	72	6	0.666667	0.0540541	4
Q04651	P21147	14	6	0.666667	0.25	4
Q04651	P40885	14	6	0.666667	0.25	4
Q04439	P40518	24	6	0.666667	0.153846	4
Q04437	P53949	110	6	0.666667	0.0357143	4
Q04437	P04819	110	21	0.666667	0.119658	14
Q04437	P31378	110	24	0.666667	0.135593	16
Q04062	P40016	22	18	0.666667	0.428571	12
Q03956	P17255	6	37	0.666667	0.102564	4
Q03956	P37296	6	15	0.666667	0.235294	4
Q03956	P32610	6	19	0.666667	0.190476	4
Q03956	P32563	6	13	0.666667	0.266667	4
Q03897	P38953	38	9	0.666667	0.146341	6
Q03776	P33203	12	14	0.666667	0.444444	8
Q03655	P21147	44	6	0.666667	0.0869565	4
Q03655	P19145	44	6	0.666667	0.0869565	4
Q03655	P38992	44	27	0.666667	0.339623	18
Q03655	P32465	44	9	0.666667	0.12766	6
Q03655	P31379	44	9	0.666667	0.12766	6
Q03654	P32523	23	15	0.666667	0.357143	10
Q03612	P15992	6	113	0.666667	0.0347826	4
Q03612	P04806	6	95	0.666667	0.0412371	4
Q03612	P04173	6	156	0.666667	0.0253165	4
P12709	P08524	120	6	0.666667	0.0327869	4
Q03532	P39744	25	15	0.666667	0.333333	10
Q03338	P19735	12	106	0.666667	0.0727273	8
Q03338	P40018	12	23	0.666667	0.296296	8
Q03338	P32639	12	26	0.666667	0.266667	8
Q03308	P53129	7	6	0.666667	0.444444	4
Q03148	P43545	6	9	0.666667	0.363636	4
Q02932	P10592	6	13	0.666667	0.266667	4
Q02932	P52918	6	24	0.666667	0.153846	4
Q02932	P52891	6	34	0.666667	0.111111	4
Q02932	P46673	6	16	0.666667	0.222222	4
Q02932	P40069	6	55	0.666667	0.0701754	4
Q02932	P36161	6	10	0.666667	0.333333	4
Q02932	P32499	6	19	0.666667	0.190476	4
Q02932	P32337	6	57	0.666667	0.0677966	4
Q02932	P30822	6	64	0.666667	0.0606061	4
Q02821	P25359	209	9	0.666667	0.0283019	6
P12398	P11154	175	12	0.666667	0.0446927	8
Q02795	P19145	33	6	0.666667	0.114286	4
Q02795	P32465	33	9	0.666667	0.166667	6
Q02774	P38428	46	15	0.666667	0.196078	10
Q02336	P50875	30	9	0.666667	0.181818	6
Q01590	P53079	21	6	0.666667	0.173913	4
Q00955	P12398	9	175	0.666667	0.0337079	6
Q00955	P04385	9	100	0.666667	0.0582524	6
Q00955	P04173	9	156	0.666667	0.0377358	6
Q00916	P32605	67	18	0.666667	0.164384	12
Q00772	P53949	76	6	0.666667	0.0512821	4
Q00684	P15731	46	6	0.666667	0.0833333	4
Q00539	P53207	22	18	0.666667	0.428571	12
Q00362	P38953	48	9	0.666667	0.117647	6
P81450	P00854	6	7	0.666667	0.444444	4
P81450	P05626	6	8	0.666667	0.4	4
P81450	P30902	6	7	0.666667	0.444444	4
P60010	P15625	125	6	0.666667	0.0314961	4
P54964	P16140	6	113	0.666667	0.0347826	4
P54964	P12709	6	120	0.666667	0.0327869	4
P54791	P00546	6	229	0.666667	0.017316	4
P53949	P32491	6	41	0.666667	0.0930233	4
P53927	P53313	30	18	0.666667	0.333333	12
P53890	P25389	7	6	0.666667	0.444444	4
P53875	P38064	9	22	0.666667	0.24	6
P53859	P25359	12	9	0.666667	0.4	6
P53859	P38792	12	12	0.666667	0.5	8
P53829	P53280	13	9	0.666667	0.375	6
P53633	P39979	20	6	0.666667	0.181818	4
P53628	P32591	6	10	0.666667	0.333333	4
P53600	P22804	6	19	0.666667	0.190476	4
P53600	P22214	6	25	0.666667	0.148148	4
P53549	P33298	21	83	0.666667	0.155556	14
P53386	P25358	12	66	0.666667	0.114286	8
P53386	P16661	12	32	0.666667	0.222222	8
P53386	P53176	12	32	0.666667	0.222222	8
P53386	P46961	12	62	0.666667	0.121212	8
P53386	P46956	12	46	0.666667	0.16	8
P53386	P40319	12	79	0.666667	0.0963855	8
P53386	P38842	12	61	0.666667	0.123077	8
P53386	P38298	12	34	0.666667	0.210526	8
P53337	P38703	38	15	0.666667	0.232558	10
P53322	P21147	38	6	0.666667	0.1	4
P53322	P19145	38	6	0.666667	0.1	4
P53322	P32465	38	9	0.666667	0.146341	6
P53280	P25655	9	25	0.666667	0.214286	6
P53280	P34909	9	9	0.666667	0.5	6
P53271	P53079	19	6	0.666667	0.190476	4
P53256	P25359	16	9	0.666667	0.315789	6
P53131	P38241	22	6	0.666667	0.166667	4
P53125	P21576	6	16	0.666667	0.222222	4
P53125	P43609	6	16	0.666667	0.222222	4
P53125	P38144	6	20	0.666667	0.181818	4
P53114	P19659	6	22	0.666667	0.166667	4
P53114	P19263	6	10	0.666667	0.333333	4
P53114	P39073	6	18	0.666667	0.2	4
P53114	P38931	6	13	0.666667	0.266667	4
P53114	P38782	6	11	0.666667	0.307692	4
P53114	P38304	6	16	0.666667	0.222222	4
P53114	P34162	6	31	0.666667	0.121212	4
P53114	P33308	6	10	0.666667	0.333333	4
P53114	P32569	6	111	0.666667	0.0353982	4
P53090	P16474	6	65	0.666667	0.0597015	4
P53090	P07262	6	18	0.666667	0.2	4
P53090	P04807	6	12	0.666667	0.285714	4
P53090	P32582	6	24	0.666667	0.153846	4
P53079	P40094	6	12	0.666667	0.285714	4
P53045	P21147	52	6	0.666667	0.0740741	4
P53045	P19145	52	6	0.666667	0.0740741	4
P53045	P38992	52	27	0.666667	0.295082	18
P53045	P32465	52	9	0.666667	0.109091	6
P53040	P50875	32	9	0.666667	0.171429	6
P50944	P25621	28	6	0.666667	0.133333	4
P50944	P21147	28	6	0.666667	0.133333	4
P50944	P19145	28	6	0.666667	0.133333	4
P50944	P32465	28	9	0.666667	0.193548	6
P49018	P21147	59	6	0.666667	0.0655738	4
P49018	P40885	59	6	0.666667	0.0655738	4
P47154	P38428	38	15	0.666667	0.232558	10
P08679	P07703	6	126	0.666667	0.03125	4
P47122	P12398	12	175	0.666667	0.0446927	8
P47122	P04173	12	156	0.666667	0.05	8
P47120	P28241	6	26	0.666667	0.142857	4
P47120	P15992	6	113	0.666667	0.0347826	4
P47120	P04173	6	156	0.666667	0.0253165	4
P47117	P33204	11	9	0.666667	0.428571	6
P47076	P25441	6	6	0.666667	0.5	4
P47076	P22276	6	12	0.666667	0.285714	4
P47076	P20436	6	14	0.666667	0.25	4
P47076	P36121	6	6	0.666667	0.5	4
P47076	P32910	6	15	0.666667	0.235294	4
P47076	P04051	6	26	0.666667	0.142857	4
P47076	P32349	6	8	0.666667	0.4	4
P47074	P40958	6	10	0.666667	0.333333	4
P46965	P21147	40	6	0.666667	0.0952381	4
P46965	P19145	40	6	0.666667	0.0952381	4
P46965	P40885	40	6	0.666667	0.0952381	4
P46965	P32465	40	9	0.666667	0.139535	6
P46961	P25621	62	6	0.666667	0.0625	4
P46961	P21147	62	6	0.666667	0.0625	4
P46961	P32465	62	9	0.666667	0.0923077	6
P46948	P25359	16	9	0.666667	0.315789	6
P46948	P38792	16	12	0.666667	0.4	8
P45976	P29468	18	19	0.666667	0.48	12
P45976	P39927	18	12	0.666667	0.363636	8
P43603	P32793	26	24	0.666667	0.470588	16
P43588	P38886	24	37	0.666667	0.355556	16
P43588	P33298	24	83	0.666667	0.175824	16
P43586	P36160	6	45	0.666667	0.0851064	4
P43565	P36017	12	32	0.666667	0.222222	8
P42943	P39079	22	18	0.666667	0.428571	12
P41810	P40509	11	9	0.666667	0.428571	6
P41277	P29311	12	86	0.666667	0.0888889	8
P41277	P40106	12	6	0.666667	0.285714	4
P40969	P32504	6	6	0.666667	0.5	4
P40548	P38703	41	15	0.666667	0.217391	10
P40509	P32074	9	16	0.666667	0.315789	6
P40480	P38262	9	29	0.666667	0.1875	6
P40413	P39078	15	23	0.666667	0.357143	10
P40356	P25648	6	7	0.666667	0.444444	4
P40356	P19263	6	10	0.666667	0.333333	4
P40356	P38782	6	11	0.666667	0.307692	4
P40356	P38304	6	16	0.666667	0.222222	4
P40356	P34162	6	31	0.666667	0.121212	4
P40356	P32585	6	13	0.666667	0.266667	4
P40356	P32569	6	111	0.666667	0.0353982	4
P40356	P32259	6	27	0.666667	0.137931	4
P40354	P08679	16	6	0.666667	0.222222	4
P07262	P06169	18	64	0.666667	0.171429	12
P40319	P22215	79	6	0.666667	0.0493827	4
P40319	P39551	79	9	0.666667	0.0731707	6
P40319	P31379	79	9	0.666667	0.0731707	6
P40303	P25451	12	9	0.666667	0.4	6
P40303	P21243	12	21	0.666667	0.32	8
P40303	P40302	12	16	0.666667	0.4	8
P40302	P25451	16	9	0.666667	0.315789	6
P40106	P29311	6	86	0.666667	0.0454545	4
P40106	P18239	6	31	0.666667	0.121212	4
P40106	P18238	6	12	0.666667	0.285714	4
P40106	P16474	6	65	0.666667	0.0597015	4
P40016	P38886	18	37	0.666667	0.27907	12
P40016	P33299	18	32	0.666667	0.315789	12
P39979	P38122	6	7	0.666667	0.444444	4
P39979	P32263	6	8	0.666667	0.4	4
P39927	P35728	12	16	0.666667	0.4	8
P39705	P20676	12	45	0.666667	0.163265	8
P39540	P21147	31	6	0.666667	0.121212	4
P39079	P15992	18	113	0.666667	0.10084	12
P39079	P39076	18	36	0.666667	0.285714	12
P38993	P21147	36	6	0.666667	0.105263	4
P38993	P32465	36	9	0.666667	0.153846	6
P38992	P21147	27	6	0.666667	0.137931	4
P38992	P38842	27	61	0.666667	0.257143	18
P38987	P38319	163	15	0.666667	0.0595238	10
P38953	P26188	9	52	0.666667	0.109091	6
P38953	P20604	9	77	0.666667	0.075	6
P38953	P18851	9	59	0.666667	0.0967742	6
P38953	P06839	9	63	0.666667	0.0909091	6
P38953	P33298	9	83	0.666667	0.0697674	6
P38953	P32641	9	43	0.666667	0.130435	6
P38911	P25491	6	103	0.666667	0.0380952	4
P38911	P04147	6	62	0.666667	0.0625	4
P38902	P20434	6	17	0.666667	0.210526	4
P38902	P16370	6	24	0.666667	0.153846	4
P38902	P04050	6	38	0.666667	0.1	4
P38843	P21147	25	6	0.666667	0.148148	4
P38842	P25621	61	6	0.666667	0.0634921	4
P38842	P21147	61	6	0.666667	0.0634921	4
P38842	P32465	61	9	0.666667	0.09375	6
P38840	P12709	9	120	0.666667	0.0487805	6
P38840	P06169	9	64	0.666667	0.0895522	6
P38837	P21147	31	6	0.666667	0.121212	4
P38815	P01123	6	25	0.666667	0.148148	4
P38815	P32912	6	22	0.666667	0.166667	4
P38792	P25359	12	9	0.666667	0.4	6
P38729	P21147	42	6	0.666667	0.0909091	4
P38729	P32465	42	9	0.666667	0.133333	6
P38723	P25621	46	6	0.666667	0.0833333	4
P38723	P21147	46	6	0.666667	0.0833333	4
P38723	P19145	46	6	0.666667	0.0833333	4
P38723	P32465	46	9	0.666667	0.122449	6
P38703	P38264	15	109	0.666667	0.0877193	10
P38634	P24814	6	28	0.666667	0.133333	4
P38634	P20438	6	16	0.666667	0.222222	4
P38634	P20437	6	15	0.666667	0.235294	4
P38634	P14682	6	7	0.666667	0.444444	4
P38623	P08018	6	30	0.666667	0.125	4
P06169	P04807	64	12	0.666667	0.117647	8
P38356	P21147	36	6	0.666667	0.105263	4
P38356	P19145	36	6	0.666667	0.105263	4
P38356	P32465	36	9	0.666667	0.153846	6
P38353	P25621	22	6	0.666667	0.166667	4
P38353	P21147	22	6	0.666667	0.166667	4
P38316	P15731	91	6	0.666667	0.0430108	4
P38298	P21147	34	6	0.666667	0.111111	4
P38298	P19145	34	6	0.666667	0.111111	4
P38298	P32465	34	9	0.666667	0.162162	6
P38286	P22215	101	6	0.666667	0.038835	4
P38286	P31379	101	9	0.666667	0.0576923	6
P38264	P25515	109	12	0.666667	0.0707965	8
P38241	P28004	6	22	0.666667	0.166667	4
P38241	P32523	6	15	0.666667	0.235294	4
P38156	P19145	18	6	0.666667	0.2	4
P38156	P32465	18	9	0.666667	0.285714	6
P38144	P32597	20	6	0.666667	0.181818	4
P37267	P25515	6	12	0.666667	0.285714	4
P37012	P12398	15	175	0.666667	0.0555556	10
P36517	P36516	6	7	0.666667	0.444444	4
P36121	P25441	6	6	0.666667	0.5	4
P36121	P22276	6	12	0.666667	0.285714	4
P36121	P20436	6	14	0.666667	0.25	4
P36121	P20434	6	17	0.666667	0.210526	4
P36121	P07703	6	126	0.666667	0.03125	4
P36121	P35718	6	15	0.666667	0.235294	4
P36121	P32910	6	15	0.666667	0.235294	4
P36121	P04051	6	26	0.666667	0.142857	4
P36121	P32349	6	8	0.666667	0.4	4
P35718	P25441	15	6	0.666667	0.235294	4
P35206	P21147	40	6	0.666667	0.0952381	4
P35206	P19145	40	6	0.666667	0.0952381	4
P35206	P32465	40	9	0.666667	0.139535	6
P04806	P00445	95	9	0.666667	0.0612245	6
P34909	P31384	9	39	0.666667	0.142857	6
P33767	P21147	39	6	0.666667	0.097561	4
P33767	P32465	39	9	0.666667	0.142857	6
P04173	P00445	156	9	0.666667	0.0377358	6
P32910	P25441	15	6	0.666667	0.235294	4
P32910	P07703	15	126	0.666667	0.0763359	10
P32898	P32473	6	17	0.666667	0.210526	4
P32803	P21147	45	6	0.666667	0.0851064	4
P32803	P19145	45	6	0.666667	0.0851064	4
P32803	P32465	45	9	0.666667	0.125	6
P32598	P08679	89	6	0.666667	0.043956	4
P32465	P25376	9	36	0.666667	0.153846	6
P32465	P04817	9	48	0.666667	0.117647	6
P32349	P25441	8	6	0.666667	0.4	4
P32263	P25659	8	6	0.666667	0.4	4
P31379	P25358	9	66	0.666667	0.0869565	6
P38286	P38264	101	109	0.663366	0.468531	67
P14540	P04173	41	156	0.658537	0.158824	27
Q99190	P38842	38	61	0.657895	0.337838	25
P47154	P35723	38	51	0.657895	0.390625	25
P53337	P36057	38	35	0.657143	0.46	23
Q12250	P33299	46	32	0.65625	0.368421	21
P53176	P25358	32	66	0.65625	0.272727	21
P35191	P04173	32	156	0.65625	0.125749	21
P33299	P33298	32	83	0.65625	0.223404	21
P28241	P04173	26	156	0.653846	0.10303	17
Q12377	P32496	30	26	0.653846	0.435897	17
Q12124	Q08278	26	32	0.653846	0.414634	17
P15703	P12398	26	175	0.653846	0.0923913	17
P15703	P09733	26	78	0.653846	0.195402	17
Q08723	P38886	26	37	0.653846	0.369565	17
Q04697	Q02774	60	46	0.652174	0.394737	30
P47079	P39078	74	23	0.652174	0.182927	15
P41811	P32581	111	23	0.652174	0.12605	15
P39078	P04385	23	100	0.652174	0.138889	15
P32641	P32581	43	23	0.652174	0.294118	15
Q04437	P08458	110	43	0.651163	0.224	28
P28834	P16140	20	113	0.65	0.108333	13
Q12522	P40078	48	20	0.65	0.236364	13
Q12445	P38723	20	46	0.65	0.245283	13
Q08980	P46961	37	62	0.648649	0.32	24
Q08980	P38842	37	61	0.648649	0.324324	24
P09734	P07251	37	109	0.648649	0.196721	24
Q99190	P38819	38	17	0.647059	0.25	11
Q06632	P42841	17	26	0.647059	0.34375	11
Q06632	P42073	17	17	0.647059	0.478261	11
Q06224	P42073	18	17	0.647059	0.458333	11
P10964	P07703	17	126	0.647059	0.0833333	11
P53344	P38723	17	46	0.647059	0.211538	11
P46961	P38819	62	17	0.647059	0.161765	11
P46961	P38298	62	34	0.647059	0.297297	22
P43561	P35723	17	51	0.647059	0.192982	11
P42841	P42073	26	17	0.647059	0.34375	11
P42073	P29468	17	19	0.647059	0.44	11
P42073	P32598	17	89	0.647059	0.115789	11
P38987	P25301	163	17	0.647059	0.0650888	11
P38842	P38819	61	17	0.647059	0.164179	11
P19882	P07342	168	31	0.645161	0.111732	20
P15992	P07342	113	31	0.645161	0.16129	20
Q12152	P07703	31	126	0.645161	0.145985	20
P46961	P39540	62	31	0.645161	0.273973	20
P22082	P18480	16	14	0.642857	0.428571	9
Q12250	P40327	46	14	0.642857	0.176471	9
Q12176	P37838	28	38	0.642857	0.375	18
Q08980	Q04651	37	14	0.642857	0.214286	9
Q08723	P43593	26	14	0.642857	0.290323	9
Q07824	P47090	37	14	0.642857	0.214286	9
Q06224	Q06102	18	14	0.642857	0.391304	9
Q06102	P25298	14	22	0.642857	0.333333	9
Q06102	P20448	14	19	0.642857	0.375	9
Q06102	P45976	14	18	0.642857	0.391304	9
Q06102	P42841	14	26	0.642857	0.290323	9
Q06102	P42073	14	17	0.642857	0.409091	9
Q05900	P32605	14	18	0.642857	0.391304	9
Q04651	P53045	14	52	0.642857	0.157895	9
Q04651	P49018	14	59	0.642857	0.140625	9
Q04651	P04817	14	48	0.642857	0.169811	9
Q04437	P38153	110	28	0.642857	0.15	18
P53549	P40327	21	14	0.642857	0.346154	9
P50944	P46965	28	40	0.642857	0.36	18
P50944	P35206	28	40	0.642857	0.36	18
P43588	P40327	24	14	0.642857	0.310345	9
P07283	P00950	14	89	0.642857	0.0957447	9
P07283	P04173	14	156	0.642857	0.0559006	9
P40327	P33297	14	22	0.642857	0.333333	9
P40327	P32496	14	26	0.642857	0.290323	9
P32502	P22133	69	28	0.642857	0.227848	18
P04173	P00924	156	67	0.641791	0.238889	43
P46367	P04385	39	100	0.641026	0.219298	25
P06169	P04173	64	156	0.640625	0.22905	41
Q08278	P25046	32	25	0.64	0.390244	16
Q04437	Q03944	110	25	0.64	0.134454	16
Q04437	P34164	110	25	0.64	0.134454	16
Q04437	P32807	110	25	0.64	0.134454	16
Q02630	Q02199	150	25	0.64	0.100629	16
P43639	P19454	25	29	0.64	0.421053	16
P32807	P14681	25	76	0.64	0.188235	16
Q03655	P38356	44	36	0.638889	0.403509	23
P30657	P23638	14	11	0.636364	0.388889	7
P23638	P21243	11	21	0.636364	0.28	7
Q99190	P38353	38	22	0.636364	0.304348	14
Q12522	P40693	48	11	0.636364	0.134615	7
Q12335	P16140	11	113	0.636364	0.0598291	7
Q12078	Q07824	11	37	0.636364	0.170732	7
Q12078	P49018	11	59	0.636364	0.111111	7
Q12078	P35206	11	40	0.636364	0.159091	7
Q12024	P40693	26	11	0.636364	0.233333	7
Q08986	P46965	22	40	0.636364	0.291667	14
Q08986	P38356	22	36	0.636364	0.318182	14
Q08278	P19659	32	22	0.636364	0.35	14
Q08273	P36009	73	11	0.636364	0.0909091	7
P14724	P09798	11	13	0.636364	0.411765	7
Q06697	P38351	11	12	0.636364	0.4375	7
Q06001	Q03944	11	25	0.636364	0.241379	7
Q04437	P36009	110	11	0.636364	0.0614035	7
Q04183	P38334	11	14	0.636364	0.388889	7
Q03776	P39682	12	11	0.636364	0.4375	7
Q03655	P46961	44	62	0.636364	0.358974	28
P54999	P40204	35	33	0.636364	0.446809	21
P53916	P20604	11	77	0.636364	0.0864198	7
P53916	P53323	11	57	0.636364	0.114754	7
P53916	P38987	11	163	0.636364	0.0419162	7
P53916	P32381	11	88	0.636364	0.076087	7
P53905	P40089	22	36	0.636364	0.318182	14
P53879	P32911	11	69	0.636364	0.0958904	7
P53731	P32381	11	88	0.636364	0.076087	7
P53207	P39682	18	11	0.636364	0.318182	7
P10080	P04147	33	62	0.636364	0.283784	21
P48743	P11633	11	17	0.636364	0.333333	7
P47079	P42943	74	22	0.636364	0.170732	14
P41811	P41810	111	11	0.636364	0.0608696	7
P40693	P40010	11	18	0.636364	0.318182	7
P39548	P38286	11	101	0.636364	0.0666667	7
P38993	P38353	36	22	0.636364	0.318182	14
P38353	P25376	22	36	0.636364	0.318182	14
P38353	P38298	22	34	0.636364	0.333333	14
P38353	P35206	22	40	0.636364	0.291667	14
P38353	P32803	22	45	0.636364	0.264151	14
P36009	P06243	11	54	0.636364	0.12069	7
Q12329	P04173	60	156	0.633333	0.213483	38
Q04437	P32328	110	30	0.633333	0.157025	19
P32328	P07703	30	126	0.633333	0.138686	19
P22804	P22214	19	25	0.631579	0.375	12
Q12329	P08431	60	19	0.631579	0.179104	12
P16140	P09232	113	19	0.631579	0.1	12
Q12102	P42841	19	26	0.631579	0.363636	12
Q04437	Q03899	110	19	0.631579	0.102564	12
Q04437	P32350	110	19	0.631579	0.102564	12
Q03899	P14681	19	76	0.631579	0.144578	12
Q02774	P53337	46	38	0.631579	0.4	24
Q01329	P42841	19	26	0.631579	0.363636	12
P53337	P08456	38	19	0.631579	0.266667	12
P09232	P04173	19	156	0.631579	0.0736196	12
P47154	P40548	38	41	0.631579	0.436364	24
P46961	P33335	62	19	0.631579	0.173913	12
P39925	P38987	19	163	0.631579	0.0705882	12
P39925	P32598	19	89	0.631579	0.125	12
P38842	P33335	61	19	0.631579	0.176471	12
P38690	P04385	19	100	0.631579	0.11215	12
P36057	P08456	35	19	0.631579	0.285714	12
P35206	P33335	40	19	0.631579	0.255319	12
P32350	P14681	19	76	0.631579	0.144578	12
P32350	P06839	19	63	0.631579	0.171429	12
Q02774	P35723	46	51	0.630435	0.426471	29
P16140	P04385	113	100	0.63	0.42	63
Q12402	Q04697	27	60	0.62963	0.242857	17
Q12402	P47154	27	38	0.62963	0.354167	17
Q03940	P04173	27	156	0.62963	0.10241	17
P46961	P28496	62	27	0.62963	0.236111	17
P38993	P38992	36	27	0.62963	0.369565	17
P28004	P21374	22	8	0.625	0.2	5
P27801	P20795	19	8	0.625	0.227273	5
P26263	P12709	8	120	0.625	0.0406504	5
P23595	P23594	45	24	0.625	0.277778	15
P22203	P17255	16	37	0.625	0.232558	10
P22137	P09436	61	8	0.625	0.078125	5
P19882	P10127	168	8	0.625	0.0292398	5
P18851	P08417	59	8	0.625	0.0806452	5
Q99380	P39007	18	8	0.625	0.238095	5
Q99190	P40890	38	8	0.625	0.121951	5
Q99190	P40886	38	8	0.625	0.121951	5
Q12522	P25582	48	8	0.625	0.0980392	5
Q12522	P32892	48	8	0.625	0.0980392	5
Q12450	P18414	42	8	0.625	0.111111	5
Q12450	P16661	42	32	0.625	0.37037	20
Q12450	P47026	42	8	0.625	0.111111	5
Q12449	P04385	16	100	0.625	0.0943396	10
Q12446	Q04322	68	8	0.625	0.0704225	5
Q12446	P38257	68	8	0.625	0.0704225	5
Q12420	P20053	16	37	0.625	0.232558	10
Q12420	P19735	16	106	0.625	0.0892857	10
Q12420	Q06819	16	8	0.625	0.263158	5
Q12389	Q12176	8	28	0.625	0.16129	5
Q12389	Q12024	8	26	0.625	0.172414	5
Q12389	Q08387	8	23	0.625	0.192308	5
Q12389	Q04373	8	20	0.625	0.217391	5
Q12389	P40991	8	58	0.625	0.0819672	5
Q12389	P40010	8	18	0.625	0.238095	5
Q12389	P37838	8	38	0.625	0.121951	5
Q12389	P36160	8	45	0.625	0.104167	5
Q12389	P32892	8	8	0.625	0.454545	5
Q12377	P50086	30	8	0.625	0.151515	5
Q12377	P43588	30	24	0.625	0.384615	15
Q12372	P40890	15	8	0.625	0.277778	5
Q12297	Q12030	8	33	0.625	0.138889	5
Q12297	Q04226	8	10	0.625	0.384615	5
Q12297	P53040	8	32	0.625	0.142857	5
Q12255	Q12241	8	10	0.625	0.384615	5
Q12250	P50086	46	8	0.625	0.102041	5
Q12250	P43588	46	24	0.625	0.272727	15
Q12223	P07276	67	8	0.625	0.0714286	5
Q12176	P32892	28	8	0.625	0.16129	5
Q08980	P40890	37	8	0.625	0.125	5
Q08980	P40886	37	8	0.625	0.125	5
Q08224	Q04120	93	8	0.625	0.0520833	5
Q08004	P25382	60	8	0.625	0.0793651	5
Q07824	P41815	37	8	0.625	0.125	5
Q07824	P40890	37	8	0.625	0.125	5
P14741	P08417	83	8	0.625	0.0581395	5
Q06819	Q06217	8	17	0.625	0.25	5
Q06819	Q03338	8	12	0.625	0.333333	5
Q06819	Q02260	8	24	0.625	0.185185	5
Q06819	P49704	8	31	0.625	0.147059	5
Q06819	P47093	8	75	0.625	0.0641026	5
Q06819	P43321	8	43	0.625	0.108696	5
Q06819	P40018	8	23	0.625	0.192308	5
Q06679	Q06078	9	8	0.625	0.416667	5
Q06679	Q02354	9	8	0.625	0.416667	5
Q06644	P40890	24	8	0.625	0.185185	5
Q06644	P40886	24	8	0.625	0.185185	5
Q06644	P38842	24	61	0.625	0.214286	15
Q06644	P38723	24	46	0.625	0.272727	15
Q06644	P04817	24	48	0.625	0.263158	15
Q06644	P35206	24	40	0.625	0.306122	15
Q06451	P53045	24	52	0.625	0.245902	15
Q06451	P40890	24	8	0.625	0.185185	5
Q06436	P53235	35	8	0.625	0.131579	5
Q06078	Q02931	8	15	0.625	0.277778	5
Q06078	Q02354	8	8	0.625	0.454545	5
Q06078	P53914	8	28	0.625	0.16129	5
Q04697	P87284	60	16	0.625	0.151515	10
Q04697	P42946	60	8	0.625	0.0793651	5
Q04697	P40886	60	8	0.625	0.0793651	5
Q04660	P08417	72	8	0.625	0.0666667	5
Q04437	P38308	110	8	0.625	0.0442478	5
Q04437	P32863	110	24	0.625	0.12605	15
Q04322	P53933	8	37	0.625	0.125	5
Q04305	Q02354	16	8	0.625	0.263158	5
Q04120	P29311	8	86	0.625	0.0561798	5
Q04120	P00950	8	89	0.625	0.0543478	5
Q04120	P17709	8	55	0.625	0.0862069	5
Q04120	P15992	8	113	0.625	0.0431034	5
Q04120	P12709	8	120	0.625	0.0406504	5
Q04120	P12398	8	175	0.625	0.0280899	5
Q04120	P07251	8	109	0.625	0.0446429	5
Q04062	P50086	22	8	0.625	0.2	5
Q03655	P41815	44	8	0.625	0.106383	5
Q03655	P40890	44	8	0.625	0.106383	5
Q03655	P40886	44	8	0.625	0.106383	5
Q03655	P40440	44	8	0.625	0.106383	5
Q03263	P38286	8	101	0.625	0.0480769	5
Q03263	P38264	8	109	0.625	0.0446429	5
Q02931	Q02354	15	8	0.625	0.277778	5
P12398	P10127	175	8	0.625	0.0280899	5
Q02795	P46964	33	8	0.625	0.138889	5
Q02774	P47026	46	8	0.625	0.102041	5
Q02774	P40350	46	24	0.625	0.272727	15
Q02354	P47083	8	8	0.625	0.454545	5
Q02354	P42945	8	15	0.625	0.277778	5
Q02354	P35194	8	22	0.625	0.2	5
Q01939	P50086	50	8	0.625	0.0943396	5
Q00402	P32908	8	24	0.625	0.185185	5
Q00246	P08417	19	8	0.625	0.227273	5
P11484	P04173	48	156	0.625	0.172414	30
P53933	P36125	37	8	0.625	0.125	5
P53914	P47083	28	8	0.625	0.16129	5
P53824	P43545	8	9	0.625	0.416667	5
P53685	P25357	8	8	0.625	0.454545	5
P53685	P50111	8	15	0.625	0.277778	5
P53685	P40480	8	9	0.625	0.416667	5
P53685	P38262	8	29	0.625	0.15625	5
P53632	P38308	39	8	0.625	0.119048	5
P53549	P50086	21	8	0.625	0.208333	5
P53337	P16661	38	32	0.625	0.4	20
P53337	P47026	38	8	0.625	0.121951	5
P53323	O13563	57	8	0.625	0.0833333	5
P53322	P40890	38	8	0.625	0.121951	5
P53313	P25382	18	8	0.625	0.238095	5
P53235	P15790	8	76	0.625	0.0632911	5
P10127	P06168	8	28	0.625	0.16129	5
P53176	P35723	32	51	0.625	0.31746	20
P53045	P15367	52	8	0.625	0.0909091	5
P53045	P41815	52	8	0.625	0.0909091	5
P53045	P40890	52	8	0.625	0.0909091	5
P53045	P40440	52	8	0.625	0.0909091	5
P52891	P46673	34	16	0.625	0.25	10
P52286	P47104	44	8	0.625	0.106383	5
P50944	P41815	28	8	0.625	0.16129	5
P50944	P40890	28	8	0.625	0.16129	5
P50944	P40440	28	8	0.625	0.16129	5
P50086	P43588	8	24	0.625	0.185185	5
P50086	P38764	8	27	0.625	0.166667	5
P49018	P40890	59	8	0.625	0.0806452	5
P49018	P35206	59	40	0.625	0.337838	25
P48510	P22141	8	44	0.625	0.106383	5
P48510	P33298	8	83	0.625	0.0581395	5
P48439	P39007	10	8	0.625	0.384615	5
P47154	P18414	38	8	0.625	0.121951	5
P47154	P40350	38	24	0.625	0.319149	15
P47083	P15646	8	31	0.625	0.147059	5
P47083	P35194	8	22	0.625	0.2	5
P47026	P46956	8	46	0.625	0.102041	5
P47026	P40548	8	41	0.625	0.113636	5
P46965	P41815	40	8	0.625	0.116279	5
P46965	P40890	40	8	0.625	0.116279	5
P46964	P39007	8	8	0.625	0.454545	5
P46961	P18414	62	8	0.625	0.0769231	5
P46961	P15367	62	8	0.625	0.0769231	5
P46961	P40890	62	8	0.625	0.0769231	5
P46961	P40886	62	8	0.625	0.0769231	5
P46961	P40478	62	8	0.625	0.0769231	5
P46961	P40440	62	8	0.625	0.0769231	5
P46961	P36062	62	8	0.625	0.0769231	5
P46956	P18414	46	8	0.625	0.102041	5
P46956	P42946	46	8	0.625	0.102041	5
P46956	P41815	46	8	0.625	0.102041	5
P46956	P40350	46	24	0.625	0.272727	15
P45976	P35728	18	16	0.625	0.416667	10
P43612	P07703	16	126	0.625	0.0757576	10
P43612	P38217	16	96	0.625	0.0980392	10
P43593	O13563	14	8	0.625	0.294118	5
P43588	P33299	24	32	0.625	0.365854	15
P42946	P25358	8	66	0.625	0.0724638	5
P42946	P16661	8	32	0.625	0.142857	5
P42946	P40319	8	79	0.625	0.0609756	5
P42946	P38842	8	61	0.625	0.078125	5
P42946	P38286	8	101	0.625	0.0480769	5
P41815	P25376	8	36	0.625	0.128205	5
P41815	P16661	8	32	0.625	0.142857	5
P41815	P40975	8	26	0.625	0.172414	5
P41815	P38842	8	61	0.625	0.078125	5
P41815	P38729	8	42	0.625	0.111111	5
P41815	P38298	8	34	0.625	0.135135	5
P41815	P04817	8	48	0.625	0.0980392	5
P41815	P32803	8	45	0.625	0.104167	5
P41811	P33750	111	24	0.625	0.125	15
P41695	P19735	8	106	0.625	0.0458716	5
P41695	P14741	8	83	0.625	0.0581395	5
P41695	P08018	8	30	0.625	0.151515	5
P41695	P07703	8	126	0.625	0.0387597	5
P41695	P39743	8	107	0.625	0.0454545	5
P41695	P32911	8	69	0.625	0.0694444	5
P41695	P32381	8	88	0.625	0.0549451	5
P40991	P32892	58	8	0.625	0.0819672	5
P40890	P25376	8	36	0.625	0.128205	5
P40890	P38993	8	36	0.625	0.128205	5
P40890	P38992	8	27	0.625	0.166667	5
P40890	P38842	8	61	0.625	0.078125	5
P40890	P38819	8	17	0.625	0.25	5
P40890	P38729	8	42	0.625	0.111111	5
P40890	P38723	8	46	0.625	0.102041	5
P40890	P38356	8	36	0.625	0.128205	5
P40890	P38353	8	22	0.625	0.2	5
P40890	P38298	8	34	0.625	0.135135	5
P40890	P38156	8	18	0.625	0.238095	5
P40890	P04817	8	48	0.625	0.0980392	5
P40890	P35206	8	40	0.625	0.116279	5
P40890	P32803	8	45	0.625	0.104167	5
P40886	P04817	8	48	0.625	0.0980392	5
P40886	P35206	8	40	0.625	0.116279	5
P40693	P32892	11	8	0.625	0.357143	5
P40548	P18414	41	8	0.625	0.113636	5
P07276	P06839	8	63	0.625	0.0757576	5
P40480	P36124	9	8	0.625	0.416667	5
P40478	P16661	8	32	0.625	0.142857	5
P40478	P40319	8	79	0.625	0.0609756	5
P40478	P39540	8	31	0.625	0.147059	5
P40478	P38837	8	31	0.625	0.147059	5
P40478	P36057	8	35	0.625	0.131579	5
P40478	P35723	8	51	0.625	0.0925926	5
P40440	P25376	8	36	0.625	0.128205	5
P40440	P38842	8	61	0.625	0.078125	5
P40440	P38356	8	36	0.625	0.128205	5
P40440	P35206	8	40	0.625	0.116279	5
P40350	P18414	24	8	0.625	0.185185	5
P40350	P36057	24	35	0.625	0.340909	15
P40010	P32892	18	8	0.625	0.238095	5
P39743	P38257	107	8	0.625	0.0454545	5
P39702	P38959	8	10	0.625	0.384615	5
P39077	P16140	16	113	0.625	0.0840336	10
P39077	P12612	16	22	0.625	0.357143	10
P39077	P04385	16	100	0.625	0.0943396	10
P38886	P33299	37	32	0.625	0.408163	20
P38842	P18414	61	8	0.625	0.078125	5
P38842	P15367	61	8	0.625	0.078125	5
P38779	P25582	29	8	0.625	0.15625	5
P38764	O13563	27	8	0.625	0.166667	5
P38729	P15367	42	8	0.625	0.111111	5
P38590	P07703	8	126	0.625	0.0387597	5
P38316	O13563	91	8	0.625	0.0531915	5
P38262	P36124	29	8	0.625	0.15625	5
P38217	P08417	96	8	0.625	0.0505051	5
P05626	P00830	8	127	0.625	0.0384615	5
P36160	P15424	45	8	0.625	0.104167	5
P36160	P32892	45	8	0.625	0.104167	5
P36124	P25357	8	8	0.625	0.454545	5
P36124	P14832	8	29	0.625	0.15625	5
P36057	P18414	35	8	0.625	0.131579	5
P35728	P20448	16	19	0.625	0.4	10
P35723	P16661	51	32	0.625	0.31746	20
P35191	P25491	32	103	0.625	0.173913	20
P33297	O13563	22	8	0.625	0.2	5
P32863	P14681	24	76	0.625	0.176471	15
P32863	P06839	24	63	0.625	0.208333	15
P32793	P32790	24	35	0.625	0.340909	15
P32582	P17709	24	55	0.625	0.234375	15
P32528	P20604	8	77	0.625	0.0625	5
P32349	P04051	8	26	0.625	0.172414	5
P32263	P15992	8	113	0.625	0.0431034	5
P31378	P08458	24	43	0.625	0.288462	15
P04397	P04173	45	156	0.622222	0.16185	28
P12398	P09734	175	37	0.621622	0.121693	23
P38886	P22141	37	44	0.621622	0.396552	23
P06169	P05694	64	37	0.621622	0.294872	23
P25491	P25303	103	29	0.62069	0.157895	18
P53261	P38779	39	29	0.62069	0.36	18
P32861	P07251	29	109	0.62069	0.15	18
P30656	P21243	22	21	0.619048	0.433333	13
P14681	P04819	76	21	0.619048	0.154762	13
Q06406	P38203	21	73	0.619048	0.160494	13
P07251	P02557	109	84	0.619048	0.368794	52
P38987	P04819	163	21	0.619048	0.0760234	13
P53254	P25586	51	34	0.617647	0.328125	21
P25336	P19735	13	106	0.615385	0.0720721	8
P23291	P06244	75	13	0.615385	0.1	8
P20436	P20435	14	13	0.615385	0.421053	8
Q99190	P53954	38	13	0.615385	0.186047	8
Q99190	P53048	38	13	0.615385	0.186047	8
Q12477	P41811	13	111	0.615385	0.0689655	8
Q12477	P38987	13	163	0.615385	0.047619	8
Q12440	P09798	13	13	0.615385	0.444444	8
P16140	P15703	113	26	0.615385	0.130081	16
Q12250	P32496	46	26	0.615385	0.285714	16
Q12021	P41811	13	111	0.615385	0.0689655	8
Q12021	P38129	13	46	0.615385	0.156863	8
Q08980	P53954	37	13	0.615385	0.190476	8
Q08980	P53048	37	13	0.615385	0.190476	8
Q06135	P53337	13	38	0.615385	0.186047	8
Q06135	P38264	13	109	0.615385	0.0701754	8
Q06135	P35723	13	51	0.615385	0.142857	8
Q04437	P41735	110	13	0.615385	0.0695652	8
Q04338	P32602	13	36	0.615385	0.195122	8
P12962	P06774	13	54	0.615385	0.135593	8
Q03655	P53048	44	13	0.615385	0.163265	8
Q02774	P25580	46	13	0.615385	0.156863	8
P53954	P53322	13	38	0.615385	0.186047	8
P53954	P46965	13	40	0.615385	0.177778	8
P53954	P46961	13	62	0.615385	0.119403	8
P53954	P38842	13	61	0.615385	0.121212	8
P53954	P38729	13	42	0.615385	0.170213	8
P53954	P38356	13	36	0.615385	0.195122	8
P53954	P38298	13	34	0.615385	0.205128	8
P53954	P04817	13	48	0.615385	0.150943	8
P53954	P35206	13	40	0.615385	0.177778	8
P53829	P25655	13	25	0.615385	0.266667	8
P53829	P39008	13	25	0.615385	0.266667	8
P53829	P31384	13	39	0.615385	0.181818	8
P53337	P25580	38	13	0.615385	0.186047	8
P53048	P49018	13	59	0.615385	0.125	8
P53048	P39540	13	31	0.615385	0.222222	8
P53048	P38993	13	36	0.615385	0.195122	8
P53048	P38723	13	46	0.615385	0.156863	8
P53048	P38298	13	34	0.615385	0.205128	8
P50095	P04147	13	62	0.615385	0.119403	8
P46367	P12709	39	120	0.615385	0.177778	24
P43321	P32639	43	26	0.615385	0.301887	16
P41811	P41735	111	13	0.615385	0.0689655	8
P41735	P32381	13	88	0.615385	0.0860215	8
P40850	P25491	13	103	0.615385	0.0740741	8
P40364	P04173	39	156	0.615385	0.140351	24
P40339	P38251	37	13	0.615385	0.190476	8
P40319	P25580	79	13	0.615385	0.0952381	8
P39928	P38217	13	96	0.615385	0.0792079	8
P39692	P07342	13	31	0.615385	0.222222	8
P39692	P38708	13	25	0.615385	0.266667	8
P39692	P04385	13	100	0.615385	0.0761905	8
P38886	P32496	37	26	0.615385	0.340426	16
P38629	P38251	34	13	0.615385	0.205128	8
P38304	P32585	16	13	0.615385	0.380952	8
P38286	P25580	101	13	0.615385	0.0754717	8
P37291	P05694	13	37	0.615385	0.190476	8
P33299	P32496	32	26	0.615385	0.380952	16
P33298	P32496	83	26	0.615385	0.172043	16
P32585	P19659	13	22	0.615385	0.296296	8
P32496	P22141	26	44	0.615385	0.296296	16
P00924	P00358	67	31	0.612903	0.240506	19
Q08278	P32570	32	31	0.612903	0.431818	19
Q04697	P39540	60	31	0.612903	0.263889	19
P22470	P07703	18	126	0.611111	0.0827068	11
P19882	P07262	168	18	0.611111	0.0628571	11
Q12522	P53313	48	18	0.611111	0.2	11
Q12250	P40016	46	18	0.611111	0.207547	11
Q12102	P45976	19	18	0.611111	0.423077	11
Q07508	P32605	23	18	0.611111	0.366667	11
Q06224	P25298	18	22	0.611111	0.37931	11
Q06224	P42841	18	26	0.611111	0.333333	11
[truncated: 2,234 more rows]
